1 **Species variations in tenocytes' response to inflammation require careful selection of animal**  
2 **models for tendon research**

3

4 **Author list: Gil Lola Oreff<sup>1+</sup>, Michele Fenu<sup>1+</sup>, Claus Vogl<sup>2</sup>, Iris Ribitsch<sup>1</sup>, Florian Jenner<sup>1\*</sup>**

5

6 1 University of Veterinary Medicine Vienna, Department of Companion Animals and  
7 Horses, Equine Surgery Unit, VETERM, Veterinaerplatz 1, 1210 Vienna, Austria

8 2 University of Veterinary Medicine Vienna, Department of Biomedical Sciences, Institute  
9 of Animal Breeding and Genetics, Veterinaerplatz 1, 1210 Vienna, Austria

10

11 **+ shared first author**

12 **\* corresponding author: F. Jenner: [Florien.Jenner@vetmeduni.ac.at](mailto:Florien.Jenner@vetmeduni.ac.at)**

13

14

15

16

17

18 **Abstract**

19 For research on tendon injury, many different animal models are utilized; however, the extent  
20 to which these species simulate the clinical condition and disease pathophysiology has not yet  
21 been critically evaluated. Considering the importance of inflammation in tendon disease, this  
22 study compared the cellular and molecular features of inflammation in tenocytes of humans  
23 and four common model species (mouse, rat, sheep, and horse). While mouse and rat  
24 tenocytes most closely equalled human tenocytes' low proliferation capacity and the negligible  
25 effect of inflammation on proliferation, the wound closure speed of humans was best  
26 approximated by rats and horses. The overall gene expression of human tenocytes was most  
27 similar to mice under healthy, to horses under transient and to sheep under constant  
28 inflammatory conditions. Humans were best matched by mice and horses in their tendon  
29 marker and collagen expression, by horses in extracellular matrix remodelling genes, and by  
30 rats in inflammatory mediators. As no single animal model perfectly replicates the clinical  
31 condition and sufficiently emulates human tenocytes, fit-for-purpose selection of the model  
32 species for each specific research question and combination of data from multiple species will  
33 be essential to optimize translational predictive validity.

34

## 35 Introduction

36 Animal models are cornerstones of biomedical and translational medicine research. They are  
37 used when it is unethical or impractical to study the target species to explore basic  
38 pathophysiological mechanisms, to evaluate safety and efficacy of new treatment approaches,  
39 and to decide whether novel therapeutic candidates warrant the economic and moral costs of  
40 clinical development.<sup>1-7</sup> For 90% of new treatment strategies, however, translation from basic  
41 science to the clinic fails, mainly because clinical trials show them to be inefficient (52%) or  
42 unsafe (24%) during phases II and III.<sup>4,5,8</sup> Such translational failures cost animal lives, strain  
43 clinical trial volunteers, and burden biomedical research, the pharmaceutical industry and  
44 health care systems. So far, attempts to optimize translational success have mainly focused on  
45 internal validity flaws such as methodological shortcomings in animal and clinical trials,  
46 publication bias, or overoptimistic conclusions about efficacy. Yet another key factor, the  
47 external validity, or generalizability, of animal models has received little attention.<sup>4,5,8-13</sup>  
48 Common problems of external validity include species differences in disease pathophysiology,  
49 common confounding comorbidities and the selection of outcome measures.<sup>5</sup> An animal model  
50 should sufficiently emulate aetiology, pathophysiology, symptomatology and response to  
51 therapeutic interventions of the target species to allow extrapolation.<sup>5,11</sup> As no single animal  
52 model perfectly recapitulates the clinical realm, fit-for-purpose validation and selection of the  
53 most appropriate model species is essential.<sup>10-13</sup> Unfortunately, for musculoskeletal disorders,  
54 such as tendinopathy, in depth validation studies of animal models beyond structural and  
55 biomechanical similarities are largely lacking.

56 Tendinopathy, a disabling overuse injury, is the most common musculoskeletal complaint for  
57 which patients seek medical attention.<sup>14</sup> It is prevalent in both occupational and athletic  
58 settings, afflicting 25% of the adult population, and accounting for 30–50% of all sport  
59 injuries.<sup>15-18</sup> Major tendons experiencing high loads are most commonly affected, especially the  
60 weight-bearing and energy-storing Achilles tendon, which routinely experiences loads of up to  
61 12.5 times the weight of the individual.<sup>6,19</sup> Many intrinsic and extrinsic factors, including age,  
62 body weight and physical loading, influence the aetiopathogenesis of tendinopathy. Overload  
63 and repetitive strain lead to accumulation of microdamage and concurrent inflammatory,  
64 dysregulated reparative and degenerative processes, causing clinical symptoms, e.g., activity-  
65 related pain, focal tendon tenderness and swelling, and functional limitations. Overt clinical  
66 symptoms such as pain are preceded by tendinous matrix remodelling, an inflammatory cellular  
67 process mediated in part by metalloproteinase enzymes.<sup>20,21</sup> Due to its low cellularity,  
68 vascularity and metabolic rate, a tendon's response to injury is inefficient, requiring lengthy  
69 periods of recuperation and often resulting in a fibrovascular scar. Scar tissue has significantly  
70 inferior biomechanical properties than the original tendon tissue and is prone to re-injury.<sup>16,22-24</sup>  
71 Current treatment options are mostly palliative and fail to restore the functional properties of  
72 injured tendons.<sup>16,22-24</sup> Tendinopathy thus has a significant adverse impact on quality of life and  
73 costs individuals and the society an estimated annual expense of \$30 billion.<sup>25,26</sup> This is driving  
74 research efforts into unravelling the molecular mechanisms of tendinopathy and developing  
75 targeted regenerative therapies. Of particular interest in this context are the cellular and  
76 molecular processes orchestrating inflammation in tendinopathy and the mechanisms

77 governing the development of chronic inflammation that fails to resolve in persistently  
78 symptomatic patients.<sup>27</sup>

79 Tendon injury induces a local inflammatory response, characterized by immune cell infiltration  
80 and the expression of pro-inflammatory mediators, which in turn reduce collagen production  
81 and induce vasodilation, angiogenesis, and matrix metalloproteinase (MMPs) expression.<sup>28-31</sup>  
82 Furthermore, the inflammatory milieu can modify tenocyte physiology by increasing metabolic  
83 activity and inducing an activated, proinflammatory phenotype with inflammation memory and  
84 the capacity for endogenous production of cytokines such as TNF- $\alpha$ , IL-1 $\beta$ , IL-6, IL-10, VEGF and  
85 TGF- $\beta$ .<sup>29,30,32</sup> While the initial inflammatory response is essential to start the healing process,  
86 sustained inflammatory conditions contribute to dysregulated matrix remodelling and  
87 fibrovascular scarring during healing.<sup>18,31</sup> Chronic inflammation thus drives tendon  
88 degeneration before tearing or any other clinical signs of tendinopathy, impairs healing after  
89 injury and promotes the development of tendinopathy.<sup>14</sup>

90  
91 While human tendon tissue can typically be procured only from individuals with advanced  
92 pathology, animal models provide the opportunity to obtain tissue during all stages of  
93 tendinopathy to study organ, cellular and molecular changes over the entire course of the  
94 disease. In animal models, consistent and repeatable injuries can be induced, evaluated and  
95 treated, while controlling for potential confounding influences.<sup>23,33,34</sup> Since no species has been  
96 established as the gold standard for tendinopathy research, many induced and spontaneous  
97 animal models ranging from small rodents (mice, rats) to large animals (sheep, horses) are  
98 utilized.<sup>19,35-43</sup> While the biomechanical properties of the various species are well established,  
99 their ability to simulate the pathophysiology of human tendon disease, including the molecular  
100 behaviour of key genes and pathways, has not been critically evaluated yet and detailed  
101 analyses of species- specific differences in cytokine expression and regulation as well as of  
102 tenocytes susceptibility to cytokines are still lacking.<sup>44</sup>

103 Considering the importance of inflammation in tendon disease,<sup>29,33,45,46</sup> this study compares the  
104 cellular and molecular features of inflammation in tenocytes of humans and four common  
105 model species (mouse, rat, sheep, and horse) to aid in the evidence-based selection of fit-for-  
106 purpose translational animal models for tendon research. Mice and rats are included due to  
107 their prevalent use as laboratory animals and availability of species-specific molecular tools.<sup>6,47</sup>  
108 Larger animals are used increasingly as translational models due to their more comparable  
109 tendon dimensions and biomechanics.<sup>23,48-50</sup> Horses present an attractive model of human  
110 tendinopathy since their superficial digital flexor tendon is a weight-bearing and energy-storing  
111 tendon analogous to the human Achilles tendon, which is similarly prone to naturally occurring  
112 tendon disease with high recurrence rates.<sup>9,51,52</sup> Furthermore equine ageing proceeds similarly  
113 to humans.<sup>39,51,52</sup> Sheep are included because features of clinical tendinopathy of horses could  
114 be emulated also in ovine induced models.<sup>51,53-57</sup> In particular, the ovine intra-synovial tendon  
115 lesion model mimics the clinical intra-synovial tendon disease of humans and horses more  
116 accurately than small animal extra-synovial models, e.g., with respect to histology and gene  
117 expression, to similarities in the biomechanical environment and to failure of lesions to  
118 heal.<sup>51,53-57</sup>

119

## 120 **Results**

### 121 Morphology

122 Tenocytes from all five species shared common characteristics with a fusiform appearance,  
123 adherence to the flask and similar dimensions (fig. 1): human tenocytes measured  $177.8 \pm 40.1$   
124  $\mu\text{m}$  (mean  $\pm$  s.d.) in length and  $20.2 \pm 4.4 \mu\text{m}$  in width, mouse  $163.7 \mu\text{m}$  ( $\pm 23.6$ )  $\times$   $19.4 \mu\text{m}$   
125 ( $\pm 3.3$ ), rat  $182.5$  ( $\pm 26.6$ )  $\times$   $24.2$  ( $\pm 8.0$ ), sheep  $206.3$  ( $\pm 45.5$ )  $\times$   $28.9$  ( $\pm 8.5$ ) and horse  $193.2$  ( $\pm 8.4$ )  $\times$   
126  $15.4$  ( $\pm 1.4$ ). In high confluency, tenocytes from human, sheep and horse showed similar  
127 morphology, creating cell bundles arranged in a storiform pattern (fig. 1A), while tenocytes  
128 from mouse and rat had a more scattered appearance with a random orientation.

129

### 130 Proliferation assay

131 Proliferation, migration and gene expression of tenocytes of all five species were compared  
132 under standard culture conditions (healthy control) as well as under transient (24 h) and  
133 constant exposure to inflammatory stimuli (fig. 2). Under healthy conditions (fig. 3, table 1),  
134 equine tenocytes had the highest proliferation rates while murine cells had the lowest. Human  
135 tenocytes exhibited the second lowest proliferation capacity with an inability to double the cell  
136 amount over the 48h observation period. Sheep and rat tenocytes were in the middle. From fig.  
137 3, it can be seen that slopes are quite variable among species, but within species variation is  
138 low. Therefore, the slopes of tendon cells of all four model species are significantly different  
139 from those of humans ( $p < 0.001$ ; to correct for multiple testing using Bonferroni with four  
140 comparisons, the nominal significance levels, 0.05, 0.01, and 0.001, are set to the corrected  
141 levels: 0.0125, 0.002, 0.0002, respectively), even for only three biological replicates per species.  
142 Under constant exposure to inflammatory stimulation (10 ng/ml IL1 $\beta$  and 10 ng/ml TNF $\alpha$ ), the  
143 proliferation of sheep tenocytes decreased significantly and fell to about human levels, i.e., the  
144 difference in the proliferation slopes between healthy and constantly inflamed sheep  
145 decreased significantly ( $p < 0.01$ ). All other differences in slopes between healthy, constantly and  
146 transiently (only 24h inflammatory stimulation) inflamed conditions were not significant.

147

### 148 Wound healing (scratch) assay

149 Gap closure was significantly different (in all cases  $p < 0.001$ ) between all conditions, fastest for  
150 healthy and slowest for constantly inflamed cells of all species (fig. 3, table 1). Murine tenocytes  
151 showed the slowest wound healing for all conditions. There was no statistically significant  
152 difference in migration speed between healthy and transient inflammatory conditions in  
153 tenocytes of any species and between healthy and continuously inflamed conditions only for  
154 mouse and rat cells ( $p < 0.05$ ).

155 Under healthy conditions, gap closure of tenocytes from all species except rats was significantly  
156 different (in all cases  $p < 0.003$ ) from humans with cells from rats showing the fastest wound  
157 healing (gap closure at 48h mean  $90.08\% \pm 8.01\%$  s.d.), closely followed by humans (gap closure  
158 at 48h mean  $86.25\% \pm 2.47\%$  s.d.) and cells from mice the slowest (gap closure at 48h mean  
159  $51.49\% \pm 10.23\%$  s.d.). Under transient inflammation rat tenocytes again were fastest (gap  
160 closure at 48h mean  $64.81\% \pm 7.84\%$  s.d.), with ovine (gap closure at 48h mean  $58\% \pm 11.17\%$   
161 s.d.), human (gap closure at 48h mean  $56.06\% \pm 25.27\%$  s.d.) and equine tenocytes (gap closure  
162 at 48h mean  $55.71\% \pm 9.6\%$  s.d.) following with similar wound healing rates, while murine

163 tendon cells again were slowest (gap closure at 48h mean  $29.46\% \pm 4.36\%$  s.d.). Under constant  
164 inflammation, equine tenocytes were fastest (gap closure at 48h mean  $35.23\% \pm 8.98\%$  s.d.)  
165 followed closely by human tendon cells (gap closure at 48h mean  $34.99\% \pm 19.12\%$  s.d.). The  
166 change in migration speed compared to healthy was significantly different from human  
167 tenocytes for ovine tendon cells under transient and equine and murine tenocytes under  
168 constant inflammation (table 1).

169

#### 170 Quantitative PCR

171 The species show variable approximations of human expression levels among functional gene  
172 groups and conditions (table 2 and 3, fig. 4 and 5, suppl. fig. 1 and 2, suppl. table 1).<sup>58</sup> A  
173 univariate Analysis of Variance (ANOVA) demonstrated significant differences between each  
174 species and humans in many genes relevant for tendon function and inflammatory response  
175 (table 2). Remarkably, healthy tenocytes of all four species show significant differences to  
176 humans in their expression of Col1, the main tendon matrix component, of collagenase MMP13  
177 and of the key inflammatory mediator COX2. Similarly, significant differences from humans in  
178 the COX2 expression of transiently inflamed tenocytes are evident for all four species and in IL6  
179 expression for all species except rats. In contrast, no significant differences to humans were  
180 seen in MMP1 expression for any species and the osteogenic marker ALP was only significantly  
181 different in healthy murine tenocytes. NFkB expression exhibited a significant difference only in  
182 healthy horse tendon cells and p53 in healthy horse and rat tenocytes.

183 To condense the information from the univariate ANOVA results to overall measures of  
184 similarity between the different animals and humans we calculated the multivariate  
185 Mahalanobis distances of the four species to humans. The Mahalanobis distance is a non-  
186 dimensional measure of dissimilarity, where between group distances are weighted by the  
187 inverses of within group variability, much like the test statistic of a t-test for one variable.  
188 Similar to its use in graphically detecting outliers in multiple dimensions, we use it to show  
189 multivariate dissimilarity in gene expression among species. In supplementary figure 1, we  
190 summarize conditions within a gene. From figure 4, it is evident that Cox2 is rather variable  
191 among species (especially human healthy cells differ from all animals, least so from mice) while  
192 showing relatively little variation within species under all conditions. Hence the Mahalanobis  
193 distances to humans are comparatively large with mice being closest to humans (suppl. fig. 1).  
194 The second immune gene, Il6, shows also relatively little within species variation (fig. 4), but  
195 comparatively less between species variation; especially rats and sheep are similar to humans,  
196 while mice and horses are slightly further away (fig. 4, suppl. fig. 1). The Mahalanobis distances  
197 (table 3) of the immune genes are relatively large compared to the other gene combinations  
198 due to low within species variability. The overall distance of the immune genes is a compromise  
199 between the two genes, such that rats are slightly more similar to humans than mice, with  
200 sheep and horses further away. When different functional groups of genes are analysed,  
201 variable Mahalanobis distances of the four model species from humans are found (table 3).  
202 While mice and horses are closest to humans in their tendon marker and collagen expression,  
203 horses appear to be by far the best model for MMPs (table 3). For the overall gene expression  
204 of healthy tenocytes, Mahalanobis distances from human tenocytes are large and similar  
205 among species, with mouse tendon cells appearing least and rat tenocytes most distant from  
206 human. For transient inflammation, Mahalanobis distances to humans are generally lower, but

207 the spread of differences widens, with horses, sheep and mice relatively close and rats clearly  
208 furthest. For constant inflammation, the pattern is qualitatively similar to that under transient  
209 inflammation. Overall, the pattern of multivariate dissimilarity of species varies widely and  
210 unpredictably among species pairs with no single species most similar to humans.

211  
212  
213 Principal Component Analysis (PCA) is an exploratory technique for reducing the complexity of  
214 data. We used expression data from all genes and plot the results for the different species x  
215 condition combinations (fig. 5, suppl. fig. 2). The plot of PC1 vs. PC3 is easier to interpret than of  
216 other combinations of PCs. (fig 5). With the exception of humans and mice, species are  
217 generally not well-separated. Within all species, the different conditions are spread along an  
218 oblique line with healthy to the upper left and inflamed to the lower right. Within mice, healthy  
219 is also separated from inflamed, while in sheep the pattern is less clear. Pairwise plots of other  
220 PCs show similar but less clear patterns (suppl. fig. 2).

## 221 222 **Discussion**

223 Choice of the most appropriate animal model is the most essential and challenging element of  
224 animal-based research, and also an important aspect of the 3Rs (i.e., replace, reduce, refine) to  
225 ensure the best use of animals.<sup>59-61</sup> Unfortunately, the choice of animal models frequently is  
226 based more on convention, financial and practical considerations, such as housing and  
227 husbandry requirements or the availability of reagents and biochemical tests, than compelling  
228 scientific evidence of the fit to human diseases and clinical contexts.<sup>4,5,9,62-64</sup> The lack of formal  
229 requirements for animal models is due to the traditional assumption that genetic homology  
230 derived from a common evolutionary origin also implies functional similarities of gene  
231 regulation, signalling pathways and developmental systems between species (the “unity in  
232 diversity” concept).<sup>7</sup> Species may, however, differ in critical aspects and rarely have assumed  
233 similarities been empirically demonstrated.<sup>7</sup> The diversity of human patients and symptoms is  
234 thus unlikely fully represented in highly inbred rodents.<sup>65,66</sup> Even humanized models, which  
235 have contributed significantly to research by facilitating functional studies in vivo, cannot  
236 replicate the complexity of human disease.<sup>67</sup>

237  
238 Both the European Medicines Agency (EMA) and the USA Federal Food and Drug Administration  
239 require the use of fit-for-purpose animal models to evaluate efficacy, durability, dose-response,  
240 degradation and safety of new therapeutics for market approval. Recently, these regulatory  
241 authorities published guidelines identifying requirements to demonstrate the relevance of  
242 animal models for investigational new product testing by cross-species comparison of the  
243 structural homology of the target, its distribution, signal transduction pathways and  
244 pharmacodynamics.<sup>68,69</sup> Furthermore, several voluntary initiatives have established criteria to  
245 encourage the evidence-based selection of animal models for stroke and schizophrenia.<sup>11,70,71</sup>  
246 To this end, both the model species and disease-induction protocols, need to be validated by  
247 comparing the animal model with the gold standard or the target species.<sup>11</sup> As no gold standard  
248 for tendon research is available, this study compared tenocyte morphology, proliferation rate,  
249 wound healing speed, and gene expression of two small animals (mouse and rat) and two large  
250 animals (sheep and horse) to human under healthy as well as “diseased” (transiently and



251 continuously inflamed) conditions to determine similarities and differences among species. It  
252 can serve as the foundation for a rational, evidence-based choice of optimal animal models for  
253 specific aspects of human tendinopathy.

254  
255 Tendon injury induces a local inflammatory response, which initiates the healing process.  
256 Tendon healing occurs in three chronologic phases: inflammation (0-7 days), proliferation (1-6  
257 weeks), and remodeling (6 weeks – 6 months). While these stages overlap, they are  
258 characterized by temporally and functionally distinct cytokine profiles and cellular processes.<sup>72</sup>  
259 The initial inflammatory phase is characterized by influx of inflammatory cells, which release  
260 chemotactic and proinflammatory cytokines and growth factors that lead to recruitment and  
261 proliferation of macrophages and resident tendon fibroblasts.<sup>44,72-83</sup> In addition, tenocytes  
262 produce also several endogenous cytokines and growth factors which contribute to the healing  
263 process in an auto- and paracrine manner.<sup>44,75</sup> During the proliferative stage tenocytes  
264 proliferate and produce an immature neomatrix with a predominance of type III rather than  
265 type I collagen.<sup>44,72,80-82,84</sup> Lastly, in the course of the remodeling phase, the cellularity  
266 decreases, matrix synthesis is reduced and collagen fibrils and tenocytes align linearly with the  
267 direction of tension.<sup>44,72-79,81-83</sup> However, in both man and horse suffering from naturally  
268 occurring tendon disease, the normal architecture, composition and function of the tendon are  
269 never completely restored, predisposing them to recurring injury and tendinopathy.<sup>44,72-79,81-83</sup>

270  
271  
272 Given the importance of inflammation in tendon injury and repair, with pro-inflammatory  
273 cytokines acting as a regulatory link between several catabolic and anabolic systems and as a  
274 double-edged sword both promoting and impeding tendon repair,<sup>44,83,85-88</sup> this study focused on  
275 the comparative response to inflammation.

276 We used IL-1 $\beta$  and TNF- $\alpha$ , two hallmark cytokines of inflammation in tendons, which are  
277 associated with tendon injury and tendinopathy in vivo and in vitro, to induce disease-relevant  
278 inflammation.<sup>28,30,33,45,89-97</sup> IL-1 activates the NF- $\kappa$ B pathway in tenocytes, induces the  
279 production of inflammatory mediators including COX2 and IL6, and matrix remodelling factors  
280 such as MMP1, MMP3 and MMP13.<sup>28,30,89-91</sup> It can even cause loss of the tenocyte phenotype,  
281 which is associated with decreased expression of tendon-related genes, e.g. COL1, SCX and  
282 TNMD.<sup>28,30,89-91</sup> Similarly TNF- $\alpha$  can strongly activate tenocytes, stimulating them to produce  
283 more cytokines, including IL-1 $\beta$ , TNF- $\alpha$ , IL-6.<sup>28,30,92-94,96</sup> Accordingly, we used tendon-specific  
284 markers (SCX, TNC, TNMD, COL1, COL3, COL5), matrix remodelling proteinases (MMP1, MMP3,  
285 MMP13) and inflammatory factors (COX2, IL6, NF- $\kappa$ B, p53) in addition to proliferation and  
286 wound healing speed as read-outs to evaluate the response to IL-1 $\beta$ / TNF- $\alpha$  induced  
287 inflammation.

288  
289 Interestingly, while mouse and rat tenocytes most closely matched human tenocytes' low  
290 proliferation capacity and minimal effect of inflammation on proliferation, the human wound  
291 closure speed was best approximated by rats and horses. Tenocyte migration to the injured  
292 tissue and proliferation are essential processes in tendon healing.<sup>98,99</sup> Accordingly,  
293 inflammatory stimulation, e.g. with IL-1 $\beta$ , has been shown to increase tenocyte migration and  
294 proliferation, the capacity for which decreases with age.<sup>80,83,87,88,100-106</sup> In this study, we



295 observed a decrease in tenocyte migration and proliferation following inflammatory stimulation  
296 in all species (statistically significant for sheep tenocyte proliferation as well as rat and mouse  
297 tendon cell migration under constant inflammation) except rats (non-significant trend toward  
298 increased proliferation), which may be due to our use of tenocytes from individuals in disease-  
299 relevant age groups.

300  
301 The overall gene expression of human tenocytes was most similar to murine under healthy,  
302 equine under transient and ovine under constant inflammatory conditions. The species  
303 difference between human and the four animal models was particularly evident in the  
304 expression of the main tendon matrix component COL1. Healthy tenocytes of all four model  
305 species exhibited significant differences to human in their expression of COL1. Col1 typically  
306 amounts to appr. 95% of total tendon collagen or 50-80% of tendon dry weight,<sup>107</sup> but  
307 cytokines, such as IL-1 $\beta$  and TNF- $\alpha$ , suppress COL1 synthesis, which leads to reduced  
308 stiffness.<sup>28,44,84,108</sup> In this study the decrease in COL1 synthesis following inflammatory  
309 stimulation could be observed in all species and was most pronounced in rat and mice, least in  
310 sheep and most similar to humans in horses.

311 The expression of the transcription factor SCX, a specific marker of the tendon/ligament  
312 lineage,<sup>109</sup> while low in all species under healthy conditions, only increased in humans upon  
313 constant inflammation. SCX is a transcription factor that regulates tendon genes, including Col1  
314 and Tnmd, and is required for normal tendon development<sup>110,111</sup> and adult tendon repair in  
315 mice.<sup>112,113</sup> An increase in its expression is likely to result in changes in the expression of its  
316 downstream genes and to be beneficial to tendon healing post injury.<sup>113</sup> The essential  
317 contribution of SCX was also shown in SCX-null mice, which fail to convert from producing  
318 primarily COL3 to synthesizing mainly COL1 during tendon repair, supporting the hypothesis  
319 that the transcriptional control of collagen type I is mediated by SCX.<sup>113</sup> Overall for the six  
320 tenogenic factors, rat tenocytes showed the largest difference to humans in the Mahalanobis  
321 distance, while tendon cells from mice and horses most closely equaled humans, indicating that  
322 these species might be most suitable for studies evaluating ECM production and tendon  
323 healing.

324 For matrix remodelling proteinases, the species differences were most prevalent for healthy  
325 tenocytes: tendon cells of all model species differed from humans for MMP13 and all but  
326 horses for MMP3. MMPs are key players in physiological and pathological tendon ECM  
327 remodeling, contributing to the degradation of tendon ECM and hence the loss of the  
328 biomechanical resistance and durability of tendon.<sup>44,114-116</sup> An increase in MMP expression has  
329 also been implicated in the pathogenesis of tendinopathy.<sup>44,116</sup> MMP13 specifically was  
330 upregulated in rotator cuff tendon tears and flexor tendon injury.<sup>117-119</sup> In this study,  
331 inflammatory stimulation increased MMP13 expression in tenocytes of all species, only  
332 minimally in mice and horses but 4-8-fold in rats, sheep and humans. In contrast, all species  
333 showed similarly increased MMP1 expression following inflammatory stimulation; no significant  
334 differences were observed in MMP1 expression in any species in any condition compared to  
335 humans. This corresponds well with other studies showing upregulation of MMP1 in ruptured  
336 tendons suggesting a high level of collagen degradation by this enzyme.<sup>120</sup> In total, for the  
337 functional group of ECM remodelling genes, horses again provided the best and rats the worst  
338 match to humans as shown in the Mahalanobis distance analysis.

339 For the expression of inflammatory mediators, the Mahalanobis distances of all species were  
340 larger than for the other functional gene groups. Although the immunophysiology of larger  
341 animal species has traditionally been presumed to be closer to humans than rodents,<sup>47,121</sup> rat  
342 tenocytes most closely approximated human tendon cells in this category. Additionally, in  
343 healthy condition, mice presented the lowest distance from all animals, rising again the  
344 question if larger animals truly are more similar to human. Remarkably, healthy and transiently  
345 inflamed tenocytes of all four model species, as well as constantly inflamed ovine and equine  
346 tenocytes, showed significant differences to human in their expression of COX2. Following  
347 inflammatory stimulation, COX2 was only significantly upregulated in humans, mice and rats.  
348 Upregulation of COX2 plays an important, multifaceted role in the inflammatory cascade in  
349 injured tendons through the synthesis of prostaglandins.<sup>125</sup> COX2 is essential in the early injury  
350 response as evidenced by impaired tendon repair following administration of selective COX2  
351 inhibitors in the early repair phase.<sup>122</sup> The lacking upregulation of sheep and horses therefore  
352 invites further investigation into the early tendon healing response in the different species *in*  
353 *vivo*.

354 Correspondingly, IL6, a cytokine with strong association with inflammation in tendon  
355 disease,<sup>58,123,124</sup> displayed significantly different expression in transiently inflamed tenocytes of  
356 all species except rats. Statistically significant differences in IL6 expression compared to human  
357 were also evident under constant inflammatory conditions for mice and horses. IL6 plays an  
358 essential role in tendon healing as repair processes in IL6 knock-out mice are impaired.<sup>38</sup> It  
359 tenocytes in two ways: i) IL6 stimulates tenocyte proliferation and survival and ii) it inhibits  
360 their tenogenic differentiation via the Janus tyrosine kinases/Stat3 signaling pathway.<sup>44,125</sup>

361  
362 Cell properties may be influenced not only by species and interdonor differences but also by  
363 cell isolation and processing methods.<sup>126,127</sup> In the present study, two isolation methods,  
364 enzymatic digestion and cell migration out of tendon explants, have been used depending on  
365 the available sample size. Enzymatic digestion was used for smaller sample sizes as higher cell  
366 yields are achieved with this method, while the explant technique is less invasive and requires  
367 less manipulation and labour. As both methods were used for all species and alterations in  
368 experimental conditions have been shown to be of minor importance to cell behaviour  
369 compared to cell source and interdonor variability,<sup>126</sup> the isolation method is unlikely to have  
370 significantly influenced the species-specific gene expression profiles observed in this study.

371  
372 In summary, the results of our study show that all four model species approximate some  
373 aspects of the behaviour of human tenocytes well and others poorly. No animal model  
374 sufficiently emulates human tenocytes' cellular and molecular features and response to  
375 inflammation to be considered the gold-standard for tendon research. Translational medicine  
376 will need to continue to rely on a fit-for-purpose selection of animal models to approximate the  
377 human condition, based on the essential characteristics that must be mimicked for a particular  
378 research question.<sup>19</sup> Peculiarities, strengths, and weaknesses of the model species need to be  
379 accounted for in the study design, analysis and interpretation.<sup>19,128,129</sup> Data from multiple  
380 animal models should be combined to optimize translational predictive validity.

381  
382 **Materials and Methods**

383 Tenocytes of four mammalian species (mouse, rat, sheep, horse) were compared with human  
384 tenocytes (n = 3 donors, i.e., biological replicates, per species). All methods and experimental  
385 protocols in this study were carried out in accordance and compliance with relevant  
386 institutional and national guidelines and regulations.

387

#### 388 Tenocyte isolation from animals

389 All animals were euthanized for reasons unrelated to this study. Based on the "Good Scientific  
390 Practice. Ethics in Science und Research" regulation implemented at the University of  
391 Veterinary Medicine Vienna, the Institutional Ethics Committee ("Ethics and Animal Welfare  
392 Committee") of the University of Veterinary Medicine Vienna does not require approval of in  
393 vitro cell culture studies, if the cells were isolated from tissue, which was obtained either solely  
394 for diagnostic or therapeutic purposes or in the course of institutionally and nationally  
395 approved experiments.

396 Species-specific, energy-storing, weight-bearing tendons were harvested from skeletally mature  
397 animals immediately following euthanasia: Achilles tendons from sheep (Merino-cross breed,  
398 female, aged 2-5 years), rats (Fischer344 breed, female, aged 3-4 months) and mice (c57bl/6  
399 breed, female, aged 8-12 weeks); superficial digital flexor tendons from the front limb of horses  
400 (7-15 years, geldings). Under sterile conditions, the paratenon was removed and the tendons  
401 were sectioned into small pieces (<0.5 × 0.5 × 0.5 cm). Isolation of cells was performed either by  
402 enzymatic digestion using 3 mg/ml collagenase type II (Gibco Life technologies, Vienna, Austria)  
403 for 6-8 hours or migration from explants (explants were removed after 7-10 days) or a  
404 combination of both. Cells were expanded until 80 - 90% confluency before passaging.

405

#### 406 Human tenocytes

407 Human tenocytes obtained with ethical approval and informed consent from the Achilles  
408 tendon of three male human donors (aged 60-90 years) in accordance with relevant guidelines  
409 and regulations (Declaration of Helsinki) were purchased in cryopreserved condition in passage  
410 two from two different providers (Pelo Biotech GmbH, Germany and Zen-Bio, North Carolina,  
411 USA with review of the protocols and consent forms by an independent review board  
412 (Institutional Review Board, Pearl Pathways, LLC) which is accredited by the Association for the  
413 Accreditation of Human Research Protection Program Inc.).

414

#### 415 Cell culture

416 The culture medium was identical for all species: minimal essential medium ( $\alpha$ -MEM, Sigma-  
417 Aldrich, Vienna, Austria) supplemented with 10% fetal bovine serum (FBS-12A, Capricorn,  
418 Ebsdorfergrund, Germany), 1% L-Glutamine (L-Alanyl L-Glutamine 200Mm, Biochrom), 100  
419 units mL<sup>-1</sup>penicillin and 0.1mg mL<sup>-1</sup>streptomycin (P/S, Sigma-Aldrich, Vienna, Austria).  
420 Cells were cultured at 37°C, 5% CO<sub>2</sub> until the desired passage and number of cells was  
421 obtained. Experiments were performed with cells either in passage 3 or 4.

422

#### 423 Morphology

424 Cells were imaged both at low and high confluency using the EVOS FL Auto imaging system in  
425 phase contrast with a 40x and 400x objective (ThermoFisher Scientific, AMEP4680). Cell

426 phenotypes and cell sheet patterns were characterised for all species and compared to human  
427 cells. Tenocyte dimensions (length and width) were measured for each of the five species.

428

#### 429 Inflammatory stimulation

430 Gene expression, proliferation and migration of tenocytes of all five species were compared  
431 under standard culture conditions (healthy control) as well as under transient (24 h) and  
432 constant exposure to inflammatory stimuli (10 ng/ml IL1 $\beta$  (Immuno Tools, Friesoythe,  
433 Germany) and 10 ng/ml TNF $\alpha$  (Immuno Tools, Friesoythe, Germany)).<sup>Dakin:2018bi 96</sup> After 24-hour  
434 exposure to inflammation, the transient inflammation group received fresh culture medium,  
435 while for the constant inflammation group fresh medium was again supplemented with  
436 inflammatory factors (fig. 2).

437

#### 438 Proliferation assay

439 Tenocytes were plated in 96-well plates (3000 cells/well in technical triplicates) and cultured  
440 under control (healthy), transient and constant inflammatory conditions. The cell number per  
441 plate was quantified via DNA fluorescence using the CyQuant assay (Invitrogen) according to  
442 the manufacturer's recommendations on day 0, 1, 2, and 3 (fig. 2). As cell proliferation sets in  
443 after a lag time of about 24 h and relative proliferation rates decrease steadily, we used log(cell  
444 nr) as the target variable and log(time in hours minus 23) as regression variable for the  
445 parametric statistical analysis.

446

#### 447 Wound healing (scratch) assay

448 Migration of tenocytes was evaluated in a wound healing model using a magnetic scratch  
449 device to create standardized cell-free gaps of 1.5 mm width in confluent sheets of  
450 tenocytes.<sup>130</sup> Cells were seeded in 12-well plates (100,000 cells/well in technical triplicates) and  
451 left to adhere overnight. Inflammatory stimuli were added to the transient and constant  
452 inflammation groups and scratches were created 48 hours after seeding under control  
453 (healthy), transient and constant inflammatory conditions (fig. 2). The cell-free area was imaged  
454 at 24h intervals (0, 24, 48, 72, 96 hours, fig. 2) in phase contrast using the EVOS FL Auto imaging  
455 system with a 4x fluorite objective using coordinate recovery function. The gap size was  
456 measured using the MRI Wound healing Tool ([http://dev.mri.cnrs.fr/projects/imagej-](http://dev.mri.cnrs.fr/projects/imagej-macros/wiki/Wound_Healing_Tool)  
457 [macros/wiki/Wound\\_Healing\\_Tool](http://dev.mri.cnrs.fr/projects/imagej-macros/wiki/Wound_Healing_Tool)) in ImageJ (<https://imagej.nih.gov/ij/>, version 2.0.0-rc-  
458 43/1.50e). As gap closure approached 100% in the fastest group, healthy rat tenocytes, at 48h,  
459 this time point was chosen as cut-off for slope calculations and comparison of conditions. For  
460 the parametric analysis, we used the untransformed gap area [mm<sup>2</sup>] as target variable and the  
461 untransformed time between 0 hours and 48 hours (before the gap closed in any of the  
462 samples) as regression variable.

463

#### 464 Quantitative PCR

465 Tenocytes were seeded in 12-well plates (100,000 cells/well in technical triplicates) and  
466 cultured under control (healthy), transient and constant inflammatory conditions. Cells  
467 were harvested for RNA isolation using RNA isolation reagent (Trizol, ThermoFisher Scientific,  
468 MA, USA) 48 hours after initiation of inflammation, as previously described.<sup>131</sup> The 48 hours

469 time point was chosen as it allows assessment of the response to inflammation as well as to  
470 removal of inflammatory stimuli.  
471 Briefly, a solution of Trizol and Chloroform (Sigma-Aldrich) in a ratio of 5 to 1 was used. Total  
472 RNA was recovered by the addition of isopropyl alcohol (Sigma-Aldrich) and glycerol (Thermo  
473 Scientific). The mixture was incubated on ice and centrifuged for 45 minutes at 13,000 rpm. The  
474 total RNA pellet was washed with 75% ethanol and solubilized in RNase-free water. Genomic  
475 DNA was removed by a DNA removal kit (Life Technologies, Carlsbad, California, USA). Two  
476 nanograms of RNA from each sample was used for the qPCR reaction (qPCR One-Step Eva  
477 Green kit, Bio&Sell, Feucht, Germany).  
478 We measured gene expression of tendon markers (TNC, TNDM, SCX), collagens (COL1, COL3,  
479 COL5), matrix-metalloproteinases (MMP1, MMP3, MMP13), inflammatory factors (IL6, COX2,  
480 NFkB, p53), a marker for aberrant tenocyte differentiation (ALP) and for focal adhesion and  
481 migration (FAK) in the four model species and humans under healthy, transiently and constantly  
482 inflamed conditions. All primers were designed using the Primer3 software. Primer sequences  
483 are shown in supplementary table 2. The transcript level for the 15 genes of interest was  
484 normalized to the transcript level of the housekeeping gene glyceraldehyde-3-phosphate  
485 dehydrogenase (GAPDH) and presented as ratio to GAPDH.<sup>58</sup> The ratio between COL 1 and COL  
486 3 was also evaluated for further matrix remodelling characterization, with a higher COL1:COL3  
487 ratio indicating a stronger tenogenic phenotype.<sup>132,133</sup> For the parametric analysis, we used the  
488  $\log_2$  transformed ratios of the target gene to GAPDH as target variable.

#### 489 Statistical analysis

491 For statistical analyses, the R statistical programming language<sup>134</sup> and GraphPad (version 8.4.2)  
492 were used. Target and regression variables (where appropriate) are given in the respective  
493 subsections. Data are presented descriptively as mean and standard deviation. Generally, linear  
494 models (analyses of variance and covariances, ANCOVA) were used, e.g., for wound healing the  
495 untransformed area was the target variable, *time* a regression variable, and *species* and  
496 *condition* factors; as interactions of two explanatory variables *time\*species*, *time\*condition*,  
497 *condition\*species*, and *biological replicate* nested within *species* were included; furthermore,  
498 the three-way interaction *time\*species\*condition* was also included. Note that all terms with  
499 *time* are to be interpreted as slopes or differences in slopes. The Tukey's HSD (honestly  
500 significant difference) test was used to account for multiple testing, where appropriate.  
501 Confidence intervals of parameter estimates were calculated.

502  
503 Note that many different target variables are available, i.e., data are multidimensional. With  
504 qPCR alone, 15 genes of interest were measured under three conditions. For each gene  
505 separately, an ANOVA with species and condition was calculated. Furthermore, we condensed  
506 information by calculating the multivariate (Mahalanobis) distance of the  $\log_2$ -transformed  
507 mRNA concentrations, for the three conditions of each gene, and report the distance of each of  
508 the four mammalian species from the human values. For a single condition, all 15 genes of  
509 interest could be used for calculating the multivariate distance. Additionally, we grouped genes  
510 into classes, e.g., all collagens or all matrix-metalloproteinases and calculated multivariate  
511 distances for the classes separately, this time jointly for the different conditions. We also  
512 calculated a principal component analysis (PCA) of the  $\log_2$ -transformed qPCR data for all gene,



513 treatment, and species combinations together. The proportions of the variance explained by  
514 the different PC's are reported and the rotated data for the different treatment and species  
515 combinations are shown in graphs for the most important components.

516

## 517 **References**

518

- 519 1. Wendler, A. & Wehling, M. The translatability of animal models for clinical development:  
520 biomarkers and disease models. *Current Opinion in Pharmacology* **10**, 601–606 (2010).
- 521 2. Wendler, A. & Wehling, M. Translatability score revisited: differentiation for distinct  
522 disease areas. *Journal of Translational Medicine* **15**, 226 (2017).
- 523 3. Henderson, V. C., Kimmelman, J., Fergusson, D., Grimshaw, J. M. & Hackam, D. G. Threats  
524 to Validity in the Design and Conduct of Preclinical Efficacy Studies: A Systematic Review  
525 of Guidelines for In Vivo Animal Experiments. *PLoS Med* **10**, e1001489 (2013).
- 526 4. Pandora Pound, M. R.-H. Is it possible to overcome issues of external validity in preclinical  
527 animal research? Why most animal models are bound to fail. *Journal of Translational  
528 Medicine* **16**, 203 (2018).
- 529 5. van der Worp, H. B. *et al.* Can Animal Models of Disease Reliably Inform Human Studies?  
530 *PLoS Med* **7**, e1000245 (2010).
- 531 6. Bottagisio, M. & Lovati, A. B. A review on animal models and treatments for the  
532 reconstruction of Achilles and flexor tendons. *J Mater Sci: Mater Med* **28**, 45 (2017).
- 533 7. Wall, R. J. & Shani, M. Are animal models as good as we think? *THE* **69**, 2–9 (2008).
- 534 8. Harrison, R. K. Phase II and phase III failures: 2013–2015. *Nature Reviews Drug Discovery*  
535 **15**, 817–818 (2016).
- 536 9. Kimmelman, J., Mogil, J. S. & Dirnagl, U. Distinguishing between Exploratory and  
537 Confirmatory Preclinical Research Will Improve Translation. *Plos Biol* **12**, e1001863  
538 (2014).
- 539 10. Ireson, C. R., Alavijeh, M. S., Palmer, A. M., Fowler, E. R. & Jones, H. J. The role of mouse  
540 tumour models in the discovery and development of anticancer drugs. *Br J Cancer* **121**,  
541 101–108 (2019).
- 542 11. Varga, O. E., Hansen, A. K., Sandøe, P. & Olsson, I. A. S. Validating Animal Models for  
543 Preclinical Research: A Scientific and Ethical Discussion. *Alternatives to Laboratory  
544 Animals* **38**, 245–248 (2019).
- 545 12. Sams-Dodd, F. Strategies to optimize the validity of disease models in the drug discovery  
546 process. *Drug Discovery Today* **11**, 355–363 (2006).
- 547 13. Denayer, T., Stöhr, T. & Van Roy, M. Animal models in translational medicine: Validation  
548 and prediction. *New Horizons in Translational Medicine* **2**, 5–11 (2014).
- 549 14. Abraham, A. C. *et al.* Targeting the NF- $\kappa$ B signaling pathway in chronic tendon disease.  
550 *Science Translational Medicine* **11**, eaav4319 (2019).
- 551 15. Docheva, D., Müller, S. A., Majewski, M. & Evans, C. H. Biologics for tendon repair.  
552 *Advanced Drug Delivery Reviews* **84**, 222–239 (2015).
- 553 16. Walden, G. *et al.* A Clinical, Biological, and Biomaterials Perspective into Tendon Injuries  
554 and Regeneration. *Tissue Engineering Part B: Reviews* **23**, 44–58 (2017).



- 555 17. Abat, F. *et al.* Current trends in tendinopathy: consensus of the ESSKA basic science  
556 committee. Part I: biology, biomechanics, anatomy and an exercise-based approach.  
557 *Journal of Experimental Orthopaedics* **4**, 1–11 (2017).
- 558 18. Crowe, L. A. N. *et al.* S100A8 & S100A9: Alarmin mediated inflammation in tendinopathy.  
559 *Scientific Reports* **9**, 1528 (2019).
- 560 19. Hast, M. W., Zuskov, A. & Soslowsky, L. J. The role of animal models in tendon research.  
561 *Bone & Joint Research* **3**, 193–202 (2014).
- 562 20. Huisman, E., Thornton, G., Roberts, C. & Scott, A. Identification of biomarkers for early  
563 tendon degeneration using an in-vivo rabbit model. *Br J Sports Med* **47**, e2.53–e2 (2013).
- 564 21. Kaux, J. F., Forthomme, B., Le Goff, C. & Crielaard, J. M. Current opinions on tendinopathy.  
565 *J Sports Sci Med* (2011).
- 566 22. Riley, G. P. Gene expression and matrix turnover in overused and damaged tendons.  
567 *Scand J Med Sci Sports* **15**, 241–251 (2005).
- 568 23. Bruns, J., Kampen, J., Kahrs, J. & Plitz, W. Achilles tendon rupture: experimental results on  
569 spontaneous repair in a sheep-model. *Knee surgery, sports traumatology, arthroscopy :  
570 official journal of the ESSKA* **8**, 364–369 (2000).
- 571 24. Gajhede-Knudsen, M., Ekstrand, J., Magnusson, H. & Maffulli, N. Recurrence of Achilles  
572 tendon injuries in elite male football players is more common after early return to play:  
573 an 11-year follow-up of the UEFA Champions League injury study. *British Journal of Sports  
574 Medicine* **47**, 763–768 (2013).
- 575 25. Barboni, B. *et al.* Indirect Co-Culture with Tendons or Tenocytes Can Program Amniotic  
576 Epithelial Cells towards Stepwise Tenogenic Differentiation. *PLoS ONE* **7**, e30974 (2012).
- 577 26. Butler, D. L. *et al.* Functional tissue engineering for tendon repair: A multidisciplinary  
578 strategy using mesenchymal stem cells, bioscaffolds, and mechanical stimulation. *J.  
579 Orthop. Res.* **26**, 1–9 (2008).
- 580 27. Dakin, S. G. *et al.* Chronic inflammation is a feature of Achilles tendinopathy and rupture.  
581 *Br J Sports Med* **52**, 359–367 (2018).
- 582 28. John, T. *et al.* Effect of pro-inflammatory and immunoregulatory cytokines on human  
583 tenocytes. *J. Orthop. Res.* **28**, 1071–1077 (2010).
- 584 29. Dakin, S. G. *et al.* Inflammation activation and resolution in human tendon disease.  
585 *Science Translational Medicine* **7**, 311ra173–311ra173 (2015).
- 586 30. Tang, C. *et al.* The roles of inflammatory mediators and immunocytes in tendinopathy.  
587 *Journal of Orthopaedic Translation* **14**, 23–33 (2018).
- 588 31. Tarafder, S. *et al.* Tendon stem/progenitor cells regulate inflammation in tendon healing  
589 via JNK and STAT3 signaling. *The FASEB journal* **31**, 3991–3998 (2017).
- 590 32. Rees, J. D., Stride, M. & Scott, A. Tendons - time to revisit inflammation. *British Journal of  
591 Sports Medicine* **48**, 1553–1557 (2013).
- 592 33. Millar, N. L., Murrell, G. A. C. & McInnes, I. B. Inflammatory mechanisms in tendinopathy  
593 – towards translation. *Nature Reviews Rheumatology* **13**, 110–122 (2017).
- 594 34. Thorpe, C. T., Clegg, P. D. & Birch, H. L. A review of tendon injury: why is the equine  
595 superficial digital flexor tendon most at risk? *Equine Veterinary Journal* **42**, 174–180  
596 (2010).

- 597 35. Barsby, T., Bavin, E. P. & Guest, D. J. Three-Dimensional Culture and Transforming Growth  
598 Factor Beta3 Synergistically Promote Tenogenic Differentiation of Equine Embryo-Derived  
599 Stem Cells. *Tissue Eng Part A* **20**, 2604–2613 (2014).
- 600 36. Beredjikian, P. K. *et al.* Regenerative versus reparative healing in tendon: a study of  
601 biomechanical and histological properties in fetal sheep. *Ann Biomed Eng* **31**, 1143–1152  
602 (2003).
- 603 37. Chhabra, A. *et al.* GDF-5 deficiency in mice delays Achilles tendon healing. *Journal of*  
604 *orthopaedic research* **21**, 826–835 (2003).
- 605 38. Lin, T. W., Cardenas, L., Glaser, D. L. & Soslowky, L. J. Tendon healing in interleukin-4 and  
606 interleukin-6 knockout mice. *Journal of Biomechanics* **39**, 61–69 (2006).
- 607 39. Lui, P. P. Y., Maffulli, N., Rolf, C. & Smith, R. K. W. What are the validated animal models  
608 for tendinopathy? *Scandinavian Journal of Medicine & Science in Sports* **21**, 3–17  
609 (2011).
- 610 40. Warden, S. J. Animal models for the study of tendinopathy. *British Journal of Sports*  
611 *Medicine* **41**, 232–240 (2007).
- 612 41. Carpenter, J. E. & Hankenson, K. D. Animal models of tendon and ligament injuries for  
613 tissue engineering applications. **25**, 1715–1722 (2004).
- 614 42. Lake, S. P., Ansorge, H. L. & Soslowky, L. J. Animal models of tendinopathy. *Disabil*  
615 *Rehabil* **30**, 1530–1541 (2008).
- 616 43. Cadby, J. A. *et al.* Further characterisation of an experimental model of tendinopathy in  
617 the horse. *Equine Veterinary Journal* **45**, 642–648 (2013).
- 618 44. Schulze-Tanzil, G. *et al.* The role of pro-inflammatory and immunoregulatory cytokines in  
619 tendon healing and rupture: new insights. *Scand J Med Sci Sports* **21**, 337–351 (2011).
- 620 45. Millar, N. L. *et al.* Inflammation is present in early human tendinopathy. *The American*  
621 *journal of sports medicine* **38**, 2085–2091 (2010).
- 622 46. Dakin, S. G. *et al.* Macrophage sub-populations and the lipoxin A4 receptor implicate  
623 active inflammation during equine tendon repair. *PLoS ONE* **7**, e32333 (2012).
- 624 47. Cibelli, J. *et al.* Strategies for Improving Animal Models for Regenerative Medicine. *Cell*  
625 *Stem Cell* **12**, 271–274 (2013).
- 626 48. Virchenko, O., Fahlgren, A., Rundgren, M. & Aspenberg, P. Early Achilles tendon healing in  
627 sheep. *Arch Orthop Trauma Surg* **128**, 1001–1006 (2008).
- 628 49. Barboni, B. *et al.* Achilles Tendon Regeneration Can Be Improved by Amniotic Epithelial  
629 Cell Allograft Transplantation. *cell transplant* **21**, 2377–2395 (2012).
- 630 50. Huri, G. *et al.* A novel repair method for the treatment of acute Achilles tendon rupture  
631 with minimally invasive approach using button implant: a biomechanical study. *Foot and*  
632 *Ankle Surgery* **19**, 261–266 (2013).
- 633 51. Dudhia, J. *et al.* Aging enhances a mechanically-induced reduction in tendon strength by  
634 an active process involving matrix metalloproteinase activity. *Aging Cell* **6**, 547–556  
635 (2007).
- 636 52. Dakin, S. G., Dudhia, J. & Smith, R. K. W. Resolving an inflammatory concept: The  
637 importance of inflammation and resolution in tendinopathy. *Veterinary Immunology and*  
638 *Immunopathology* **158**, 121–127 (2014).
- 639 53. Tsang, A. S. *et al.* Effects of tendon injury on uninjured regional tendons in the distal limb:  
640 An in-vivo study using an ovine tendinopathy model. *PLoS ONE* **14**, e0215830 (2019).

- 641 54. Khan, M. R. *et al.* Evaluation of the Effects of Synovial Multipotent Cells on Deep Digital  
642 Flexor Tendon Repair in a Large Animal Model of Intra-Synovial Tendinopathy. *Journal of*  
643 *orthopaedic research* **38**, 128–138 (2019).
- 644 55. Smith, M. M. *et al.* Modulation of aggrecan and ADAMTS expression in ovine  
645 tendinopathy induced by altered strain. *Arthritis & Rheumatism* **58**, 1055–1066 (2008).
- 646 56. Biasutti, S. *et al.* Spatiotemporal variations in gene expression, histology and  
647 biomechanics in an ovine model of tendinopathy. *PLoS ONE* **12**, e0185282 (2017).
- 648 57. Jacobsen, E. *et al.* Focal Experimental Injury Leads to Widespread Gene Expression and  
649 Histologic Changes in Equine Flexor Tendons. *PLoS ONE* **10**, e0122220 (2015).
- 650 58. Legerlotz, K., Jones, E. R., Screen, H. R. C. & Riley, G. P. Increased expression of IL-6 family  
651 members in tendon pathology. *Rheumatology* **51**, 1161–1165 (2012).
- 652 59. Ferreira, G. S. *et al.* A standardised framework to identify optimal animal models for  
653 efficacy assessment in drug development. *PLoS ONE* **14**, e0218014 (2019).
- 654 60. Wood, M. W. & Hart, L. A. Selecting appropriate animal models and strains: making the  
655 best use of research, information and outreach. *AATEX* **14**, 303–306 (2007).
- 656 61. Swearngen, J. R. Choosing the right animal model for infectious disease research. *Animal*  
657 *Models and Experimental Medicine* **1**, 100–108 (2018).
- 658 62. Singh, V. P. *et al.* Critical evaluation of challenges and future use of animals in  
659 experimentation for biomedical research: *Int J Immunopathol Pharmacol* **29**, 551–561  
660 (2016).
- 661 63. de Vries, R. B. M., Buma, P., Leenaars, M., Ritskes-Hoitinga, M. & Gordijn, B. Reducing the  
662 Number of Laboratory Animals Used in Tissue Engineering Research by Restricting the  
663 Variety of Animal Models. Articular Cartilage Tissue Engineering as a Case Study. *Tissue*  
664 *Engineering Part B: Reviews* **18**, 427–435 (2012).
- 665 64. de Vries, R. B. M. *et al.* The Usefulness of Systematic Reviews of Animal Experiments for  
666 the Design of Preclinical and Clinical Studies. *ILAR Journal* **55**, 427–437 (2014).
- 667 65. Bolker, J. There's more to life than rats and flies. *Nature* **491**, 31–33 (2012).
- 668 66. Mestas, J. & Hughes, C. C. W. Of Mice and Not Men: Differences between Mouse and  
669 Human Immunology. *Journal of immunology* **172**, 2731–2738 (2004).
- 670 67. Laudanski, K. *et al.* Potential Pitfalls of the Humanized Mice in Modeling Sepsis.  
671 *International Journal of Inflammation* **2018**, 1–9 (2018).
- 672 68. US Food and Drug Administration - Center for Drug Evaluation and Research. *Product*  
673 *development under the animal rule: guidance for industry.* (2015).
- 674 69. European Medicines Agency. *Guideline on strategies to identify and mitigate risks for first-*  
675 *in-human and early clinical trials with investigational medicinal products.* (2017).
- 676 70. Regenber, A. *et al.* The Role of Animal Models in Evaluating Reasonable Safety and  
677 Efficacy for Human Trials of Cell-Based Interventions for Neurologic Conditions. *J. Cereb.*  
678 *Blood Flow Metab.* **29**, 1–9 (2008).
- 679 71. Markou, A., Chiamulera, C., Geyer, M. A., Tricklebank, M. & Steckler, T. Removing  
680 Obstacles in Neuroscience Drug Discovery: The Future Path for Animal Models.  
681 *Neuropsychopharmacol* **34**, 74–89 (2008).
- 682 72. Leong, N. L. *et al.* Tendon and Ligament Healing and Current Approaches to Tendon and  
683 Ligament Regeneration. *J. Orthop. Res.* **38**, 7–12 (2020).

- 684 73. Chang, J. *et al.* Gene Expression of Transforming Growth Factor Beta-1 in Rabbit Zone II  
685 Flexor Tendon Wound Healing: Evidence for Dual Mechanisms of Repair. *Plastic and*  
686 *Reconstructive Surgery* **100**, 937–944 (1997).
- 687 74. Chan, B. P. *et al.* Effects of basic fibroblast growth factor (bFGF) on early stages of tendon  
688 healing: a rat patellar tendon model. *Acta orthopaedica Scandinavica* **71**, 513–518 (2000).
- 689 75. Chbinou, N. & Frenette, J. Insulin-dependent diabetes impairs the inflammatory response  
690 and delays angiogenesis following Achilles tendon injury. *Am. J. Physiol. Regul. Integr.*  
691 *Comp. Physiol.* **286**, R952–7 (2004).
- 692 76. Sharma, P. & Maffulli, N. Basic biology of tendon injury and healing. *The Surgeon* **3**, 309–  
693 316 (2005).
- 694 77. Sharma, P. & Maffulli, N. Biology of tendon injury: healing, modeling and remodeling.  
695 *Journal of musculoskeletal & neuronal interactions* **6**, 181–190 (2006).
- 696 78. Tohyama, H., Yasuda, K., Uchida, H. & Nishihira, J. The responses of extrinsic fibroblasts  
697 infiltrating the devitalised patellar tendon to IL-1 $\beta$  are different from those of normal  
698 tendon fibroblasts. *The Journal of bone and joint surgery. British volume* **89-B**, 1261–1267  
699 (2007).
- 700 79. Chen, C. H. *et al.* Tendon Healing In Vivo: Gene Expression and Production of Multiple  
701 Growth Factors in Early Tendon Healing Period. *YJHSU* **33**, 1834–1842 (2008).
- 702 80. Chang, H. N. *et al.* The effect of aging on migration, proliferation, and collagen expression  
703 of tenocytes in response to ciprofloxacin. *J. Orthop. Res.* **30**, 764–768 (2012).
- 704 81. Loiselle, A. E. *et al.* Remodeling of murine intrasynovial tendon adhesions following injury:  
705 MMP and neotendon gene expression. *J. Orthop. Res.* **27**, 833–840 (2009).
- 706 82. Thomopoulos, S., Parks, W. C., Rifkin, D. B. & Derwin, K. A. Mechanisms of tendon injury  
707 and repair. *J. Orthop. Res.* **33**, 832–839 (2015).
- 708 83. Paterson, Y. Z. *et al.* Genome-wide transcriptome analysis reveals equine embryonic stem  
709 cell-derived tenocytes resemble fetal, not adult tenocytes. *Stem Cell Res Ther* **11**, 53  
710 (2020).
- 711 84. Maffulli, N., Ewen, S. W. B., Waterston, S. W., Reaper, J. & Barrass, V. Tenocytes from  
712 Ruptured and Tendinopathic Achilles Tendons Produce Greater Quantities of Type III  
713 Collagen than Tenocytes from Normal Achilles Tendons. *The American journal of sports*  
714 *medicine* (2016). doi:10.1177/03635465000280040901
- 715 85. Eming, S. A., Hammerschmidt, M., Krieg, T. & Roers, A. Interrelation of immunity and  
716 tissue repair or regeneration. *Seminars in Cell & Developmental Biology* **20**, 517–527  
717 (2009).
- 718 86. Manning, C. N. *et al.* The early inflammatory response after flexor tendon healing: a gene  
719 expression and histological analysis. *J. Orthop. Res.* **32**, 645–652 (2014).
- 720 87. Wang, Y. *et al.* Aspirin inhibits inflammation and scar formation in the injury tendon  
721 healing through regulating JNK/STAT-3 signalling pathway. *Cell Proliferation* **52**, 1397  
722 (2019).
- 723 88. Adam, B. *et al.* Oral Ibuprofen Interferes with Cellular Healing Responses in a Murine  
724 Model of Achilles Tendinopathy. *J Musculoskelet Disord Treat* **4**, (2018).
- 725 89. Zhang, K., Asai, S., Yu, B. & Enomoto-Iwamoto, M. IL-1 $\beta$  irreversibly inhibits tenogenic  
726 differentiation and alters metabolism in injured tendon-derived progenitor cells in vitro.  
727 *Biochemical and Biophysical Research Communications* **463**, 667–672 (2015).

- 728 90. Tsuzaki, M. *et al.* IL-1 $\beta$  induces COX2, MMP-1, -3 and -13, ADAMTS-4, IL-1 $\beta$  and IL-6 in  
729 human tendon cells. *J. Orthop. Res.* **21**, 256–264 (2006).
- 730 91. Yang, G., Im, H.-J. & Wang, J. H.-C. Repetitive mechanical stretching modulates IL-1beta  
731 induced COX-2, MMP-1 expression, and PGE2 production in human patellar tendon  
732 fibroblasts. *Gene* **363**, 166–172 (2005).
- 733 92. Machner, A. *et al.* Higher susceptibility to Fas ligand induced apoptosis and altered  
734 modulation of cell death by tumor necrosis factor- $\alpha$  in periarticular tenocytes from  
735 patients with knee joint osteoarthritis. *Arthritis Res Ther* **5**, R253 (2003).
- 736 93. Hosaka, Y., Kirisawa, R., Ueda, H., Yamaguchi, M. & Takehana, K. Differences in tumor  
737 necrosis factor (TNF)alpha and TNF receptor-1-mediated intracellular signaling factors in  
738 normal, inflamed and scar-formed horse tendons. *The Journal of veterinary medical  
739 science / the Japanese Society of Veterinary Science* **67**, 985–991 (2005).
- 740 94. D'Addona, A., Maffulli, N., Formisano, S. & Rosa, D. Inflammation in tendinopathy. *The  
741 Surgeon* **15**, 297–302 (2017).
- 742 95. Stolk, M. *et al.* New insights into tenocyte-immune cell interplay in an in vitro model of  
743 inflammation. *Scientific Reports* **7**, 9801 (2017).
- 744 96. Gaida, J. E. *et al.* Evidence of the TNF- $\alpha$  system in the human Achilles tendon: expression  
745 of TNF- $\alpha$  and TNF receptor at both protein and mRNA levels in the tenocytes. *Cells Tissues  
746 Organs* **196**, 339–352 (2012).
- 747 97. Kimmerling, K. A., McQuilling, J. P., Staples, M. C. & Mowry, K. C. Tenocyte cell density,  
748 migration, and extracellular matrix deposition with amniotic suspension allograft. *J.  
749 Orthop. Res.* **37**, 412–420 (2019).
- 750 98. Tsai, W.-C. *et al.* Effects of celecoxib on migration, proliferation and collagen expression  
751 of tendon cells. *Connective Tissue Research* **48**, 46–51 (2007).
- 752 99. Larson, B. J., Longaker, M. T. & Lorenz, H. P. Scarless fetal wound healing: a basic science  
753 review. *Plastic and Reconstructive Surgery* **126**, 1172–1180 (2010).
- 754 100. Tsai, W.-C. *et al.* Decreased proliferation of aging tenocytes is associated with down-  
755 regulation of cellular senescence-inhibited gene and up-regulation of p27. *J. Orthop. Res.*  
756 **29**, 1598–1603 (2011).
- 757 101. Klatte-Schulz, F. *et al.* Influence of age on the cell biological characteristics and the  
758 stimulation potential of male human tenocyte-like cells. *European cells & materials* **24**,  
759 74–89 (2012).
- 760 102. Lee, Y. W. *et al.* Effects of Redox Modulation on Cell Proliferation, Viability, and Migration  
761 in Cultured Rat and Human Tendon Progenitor Cells. *Oxidative Medicine and Cellular  
762 Longevity* **2017**, 8785042 (2017).
- 763 103. Jackson, J. E., Kopecki, Z., Anderson, P. J. & Cowin, A. J. In vitro analysis of the effect of  
764 Flightless I on murine tenocyte cellular functions. *J Orthop Surg Res* **15**, 1–14 (2020).
- 765 104. Lui, P. P. Y. & Wong, C. M. Biology of Tendon Stem Cells and Tendon in Aging. *Frontiers in  
766 Genetics* **10**, 2716 (2020).
- 767 105. Kohler, J. *et al.* Uncovering the cellular and molecular changes in tendon stem/progenitor  
768 cells attributed to tendon aging and degeneration. *Aging Cell* **12**, 988–999 (2013).
- 769 106. Jiang, D. *et al.* Effect of Young Extrinsic Environment Stimulated by Hypoxia on the  
770 Function of Aged Tendon Stem Cell. *Cell Biochem Biophys* **70**, 967–973 (2014).



- 771 107. Riley, G. P. *et al.* Tendon degeneration and chronic shoulder pain: changes in the collagen  
772 composition of the human rotator cuff tendons in rotator cuff tendinitis. *Annals of the*  
773 *Rheumatic Diseases* **53**, 359–366 (1994).
- 774 108. Qi, J. *et al.* Interleukin-1beta increases elasticity of human bioartificial tendons. *Tissue*  
775 *Engineering* **12**, 2913–2925 (2006).
- 776 109. Liu, Y., Suen, C.-W., Zhang, J.-F. & Li, G. Current concepts on tenogenic differentiation and  
777 clinical applications. *Journal of Orthopaedic Translation* **9**, 28–42 (2017).
- 778 110. Shukunami, C. *et al.* Scleraxis is a transcriptional activator that regulates the expression of  
779 Tenomodulin, a marker of mature tenocytes and ligamentocytes. *Scientific Reports* **8**,  
780 3155 (2018).
- 781 111. Léjard, V. *et al.* Scleraxis and NFATc Regulate the Expression of the Pro- $\alpha$ 1(I) Collagen  
782 Gene in Tendon Fibroblasts. *The Journal of biological chemistry* **282**, 17665–17675 (2007).
- 783 112. Sakabe, T. *et al.* Transcription factor scleraxis vitally contributes to progenitor lineage  
784 direction in wound healing of adult tendon in mice. *Journal of Biological Chemistry* **293**,  
785 5766–5780 (2018).
- 786 113. McClellan, A. *et al.* A novel mechanism for the protection of embryonic stem cell derived  
787 tenocytes from inflammatory cytokine interleukin 1 beta. *Scientific Reports* **9**, 53 (2019).
- 788 114. Archambault, J. M., Elfervig-Wall, M. K., Tsuzaki, M., Herzog, W. & Banes, A. J. Rabbit  
789 tendon cells produce MMP-3 in response to fluid flow without significant calcium  
790 transients. *Journal of Biomechanics* **35**, 303–309 (2002).
- 791 115. Archambault, J., Tsuzaki, M., Herzog, W. & Banes, A. J. Stretch and interleukin-1beta  
792 induce matrix metalloproteinases in rabbit tendon cells in vitro. *Journal of orthopaedic*  
793 *research* **20**, 36–39 (2002).
- 794 116. Arnoczky, S. P., LAVAGNINO, M., Egerbacher, M., Caballero, O. & Gardner, K. Matrix  
795 Metalloproteinase Inhibitors Prevent a Decrease in the Mechanical Properties of Stress-  
796 Deprived Tendons: An In Vitro Experimental Study. *American Journal of Sports Medicine*  
797 **35**, 763–769 (2007).
- 798 117. Berglund, M., Hart, D. A. & Wiig, M. The inflammatory response and hyaluronan  
799 synthases in the rabbit flexor tendon and tendon sheath following injury. *J Hand Surg Eur*  
800 *Vol* **32**, 581–587 (2007).
- 801 118. Lo, I. K. Y., Marchuk, L. L., Hollinshead, R., Hart, D. A. & Frank, C. B. Matrix  
802 Metalloproteinase and Tissue Inhibitor of Matrix Metalloproteinase mRNA Levels are  
803 Specifically Altered in Torn Rotator Cuff Tendons. *American Journal of Sports Medicine* **32**,  
804 1223–1229 (2017).
- 805 119. Sun, H. B. *et al.* Coordinate Regulation of IL-1 $\beta$  and MMP-13 in Rat Tendons Following  
806 Subrupture Fatigue Damage. *Clin Orthop Relat Res* **466**, 1555–1561 (2008).
- 807 120. Jones, G. C. *et al.* Expression profiling of metalloproteinases and tissue inhibitors of  
808 metalloproteinases in normal and degenerate human achilles tendon. *Arthritis &*  
809 *Rheumatism* **54**, 832–842 (2006).
- 810 121. Seok, J. *et al.* Genomic responses in mouse models poorly mimic human inflammatory  
811 diseases. *Proceedings of the National Academy of Sciences of the United States of America*  
812 **110**, 3507–3512 (2013).



- 813 122. Sauerschnig, M. *et al.* Effect of COX-2 inhibition on tendon-to-bone healing and PGE2  
814 concentration after anterior cruciate ligament reconstruction. *Eur. J. Med. Res.* **23**, 276  
815 (2018).
- 816 123. Morita, W., Dakin, S. G., Snelling, S. J. B. & Carr, A. J. Cytokines in tendon disease: A  
817 Systematic Review. *Bone & Joint Research* **6**, 656–664 (2017).
- 818 124. Radovanović, G., Wolfarth, B. & Legerlotz, K. Interleukin-6 levels drop after a 12 week  
819 long physiotherapeutic intervention in patients with Achilles tendinopathy—a pilot study.  
820 *Translational Sports Medicine* **2**, 233–239 (2019).
- 821 125. Chen, S. *et al.* Interleukin-6 Promotes Proliferation but Inhibits Tenogenic Differentiation  
822 via the Janus Kinase/Signal Transducers and Activators of Transcription 3 (JAK/STAT3)  
823 Pathway in Tendon-Derived Stem Cells. *Med Sci Monit* **24**, 1567–1573 (2018).
- 824 126. Gittel, C. *et al.* Isolation of equine multipotent mesenchymal stromal cells by enzymatic  
825 tissue digestion or explant technique: comparison of cellular properties. *BMC Veterinary*  
826 *Research* **9**, 221 (2013).
- 827 127. Wagenhäuser, M. U. *et al.* Collagen type I and decorin expression in tenocytes depend on  
828 the cell isolation method. *BMC Musculoskelet Disord* **13**, 140 (2012).
- 829 128. Wehling, M. Assessing the translatability of drug projects: what needs to be scored to  
830 predict success? *Nature Reviews Drug Discovery* **8**, 541–546 (2009).
- 831 129. Davidson, M. K., Lindsey, J. R. & Davis, J. K. Requirements and selection of an animal  
832 model. *Isr. J. Med. Sci.* **23**, 551–555 (1987).
- 833 130. Fenu, M. *Evaluation and quantification of novel scratch assay to mimic wound healing*  
834 *model.* (2018).
- 835 131. Haltmayer, E. *et al.* Co-culture of osteochondral explants and synovial membrane as in  
836 vitro model for osteoarthritis. *PLoS ONE* **14**, e0214709 (2019).
- 837 132. Yao, L., Bestwick, C. S., Bestwick, L. A., Maffulli, N. & Aspden, R. M. Phenotypic drift in  
838 human tenocyte culture. *Tissue Engineering* **12**, 1843–1849 (2006).
- 839 133. Costa-Almeida, R., Calejo, I., Reis, R. L. & Gomes, M. E. Crosstalk between adipose stem  
840 cells and tendon cells reveals a temporal regulation of tenogenesis by matrix deposition  
841 and remodeling. *J. Cell. Physiol.* **233**, 5383–5395 (2017).
- 842 134. R Core Team. *R: A language and environment for statistical computing.* (R Foundation for  
843 Statistical Computing, 2017).

844  
845  
846  
847

#### 848 **Acknowledgements**

849 The authors acknowledge Sinan Gültekin for his technical and John Breteler for his graphical  
850 support. This research was supported by the Austrian Research Promotion agency (grant  
851 number 7269695) and the University of Vienna tandem PhD programme.

852

#### 853 **Conflict of Interest:**

854 The authors have no competing interests to declare.

## 855 **Figure Legends**

856

857 Figure 1: Micrographs of tenocytes derived from the Achilles tendon in the mouse, rat, sheep  
858 and human or the superficial digital flexor tendon in the horse. Figure 1A shows the tenocytes  
859 at a magnification of 40x (scale bar: 1000 $\mu$ m), while figure 1B was taken at a 400x magnification  
860 (scale bar: 100 $\mu$ m).

861

862

863 Figure 2: Study timeline detailing the experimental protocol. Gene expression, proliferation and  
864 migration of tenocytes of all five species (human, mouse, rat, sheep, horse) were compared  
865 under standard culture conditions (healthy control) as well as under transient (24 h) and  
866 constant exposure to inflammatory stimuli (10 ng/ml IL1 $\beta$  and 10 ng/ml TNF $\alpha$ ). After 24-hour  
867 exposure to inflammation, the transient inflammation group received fresh culture medium,  
868 while for the constant inflammation group fresh medium was again supplemented with  
869 inflammatory factors.

870

871

872 Figure 3 : The proliferation capacity (A-C) of tenocytes from 5 different mammalian species  
873 (mouse, rat, sheep, horse, and human) under healthy (Ctr/A), transient (TI/B) and constant  
874 (CI/C) inflammatory condition is illustrated as fold increase over the course of 2 days (indicated  
875 as mean  $\pm$  SEM calculated from three biological replicates). For pairwise comparisons and  
876 significance values see table 1.

877 A wound healing assay (D-F) was used to determine the migratory capacity of tenocytes from  
878 five different mammalian species under healthy (D), transient (E) and constant (F) inflammatory  
879 conditions (indicated as mean  $\pm$  SEM calculated from three biological replicates). For pairwise  
880 comparisons and significance values see table 1.

881

882

883 Figure 4: Scatter dot plots showing COL1, SCX, MMP1, MMP13, COX2 and IL6 gene expression  
884 (presented as log<sub>2</sub>) of healthy tenocytes and tenocytes exposed to inflammatory stimuli for 24h  
885 (transient inflammation) or continuously (constant inflammation) in different species (the black  
886 lines indicate the respective means). Gene expression in the inflammatory conditions is shown  
887 relative to the healthy tenocytes. Each dot represents a different biological replicate.

888 Differences were evaluated using ANOVA with Tukey HSD test, \*p<0,05; \*\*p<0,01; \*\*\*p<0,001

889

890

891 Figure 5: Plot of PC1 (explaining 36% of the variance) vs. PC3 (explaining 14% of the variance) of  
892 a Principal Component Analysis of gene expression values. Species are colour coded, conditions  
893 (healthy, transiently inflamed, and continuously inflamed) are differentiated by symbols. Each  
894 dot represents a different biological replicate.

895

896

897

898

899 **Tables**

900

901 Table 1: The first column corresponds to the healthy situation, the second and third to  
902 transiently and constantly inflamed, respectively. First rows (human) correspond to tests for  
903 non-zero slopes of the proliferation and migration curves in humans, i.e., either non-zero  
904 proliferation or non-zero gap closure in humans. Second to fifth rows (different animal species)  
905 correspond to tests of differences of the animal models to humans in the slopes of the  
906 proliferation and migration curves of tenocytes. Calculations used an ANCOVA. Means,  
907 standard errors and p-values are reported. To correct for multiple testing with four  
908 comparisons using Bonferroni, the nominal significance levels (0.05, 0.01, and 0.001) are set to  
909 the corrected levels (0.0125, 0.002, 0.0002, respectively). P-values are marked with stars from \*  
910 (significant) to \*\*\* (highly significant) using this correction.

911

912

| SPECIES       |       | HEALTHY                      |                   |                | TRANSIENT INFLAMMATION         |                   |                  | CONSTANT INFLAMMATION          |                   |                  |
|---------------|-------|------------------------------|-------------------|----------------|--------------------------------|-------------------|------------------|--------------------------------|-------------------|------------------|
|               |       | <i>prolif. slope</i>         | <i>Std. error</i> | <i>p-value</i> | <i>slope: diff. to healthy</i> | <i>Std. error</i> | <i>p-value</i>   | <i>slope: diff. to healthy</i> | <i>Std. error</i> | <i>p-value</i>   |
| PROLIFERATION | Human | 0.1027                       | 0.0168            | 1.75e-09 ***   | -0.0167                        | 0.0237            | 0.4801           | 0.0089                         | 0.0237            | 0.7074           |
|               |       | <i>slope: diff. to human</i> | <i>St. error</i>  | <i>p-value</i> | <i>slope: diff. to human</i>   | <i>St. error</i>  | <i>p-value</i>   | <i>slope: diff. to human</i>   | <i>St. error</i>  | <i>p-value</i>   |
|               | Mouse | -0.1250                      | 0.0237            | 1.95e-07 ***   | 0.0508                         | 0.0335            | 0.1301           | -0.0301                        | 0.0335            | 0.3691           |
|               | Rat   | 0.0933                       | 0.0237            | 9.35e-05 ***   | -0.0038                        | 0.0335            | 0.9103           | 0.0420                         | 0.0335            | 0.2103           |
|               | Sheep | 0.1169                       | 0.0237            | 1.10e-06 ***   | 0.0585                         | 0.0335            | 0.0815           | <b>-0.0878</b>                 | <b>0.0335</b>     | <b>0.00900</b> * |
|               | Horse | 0.3000                       | 0.0237            | < 2e-16 ***    | 0.0233                         | 0.0335            | 0.4868           | -0.0640                        | 0.0335            | 0.0568           |
|               |       | <i>migration slope</i>       | <i>Std. Error</i> | <i>p-value</i> | <i>slope: diff. to healthy</i> | <i>St. error</i>  | <i>p-value</i>   | <i>slope: diff. to healthy</i> | <i>St. error</i>  | <i>p-value</i>   |
| MIGRATION     | Human | -0.0792257                   | 0.0032            | < 2e-16 ***    | 0.0277                         | 0.0045            | 2.76e-09 ***     | 0.0475                         | 0.0045            | < 2e-16 ***      |
|               |       | <i>slope: diff. to human</i> | <i>Std. Error</i> | <i>p-value</i> | <i>slope: diff. to human</i>   | <i>St. error</i>  | <i>p-value</i>   | <i>slope: diff. to human</i>   | <i>St. error</i>  | <i>p-value</i>   |
|               | Mouse | 0.0311503                    | 0.0045            | 3.07e-11 ***   | -0.0075                        | 0.0064            | 0.2452           | -0.0156                        | 0.0064            | 0.0154           |
|               | Rat   | 0.0001854                    | 0.0046            | 0.9155         | -0.0063                        | 0.0064            | 0.3287           | 0.0035                         | 0.0065            | 0.5938           |
|               | Sheep | 0.0185550                    | 0.0045            | 5.46e-05 ***   | <b>-0.0188</b>                 | <b>0.0064</b>     | <b>0.00374</b> * | -0.0112                        | 0.0064            | 0.0811           |
|               | Horse | 0.0132563                    | 0.0045            | 0.00375 **     | -0.0123                        | 0.0064            | 0.0567           | -0.0140                        | 0.0064            | 0.0302           |

913

914

915

916

917 Table 2: Mean difference to human and p-values of the gene expression calculated with ANOVA  
918 of healthy, transiently inflamed and constantly inflamed tenocytes of the four animal model  
919 species. Significant p-values (Tukey HSD correction) and the matching mean differences in gene  
920 expression to humans are indicated in bold.  
921

|                       |                        |       | SC X  | TN C  | TN M  | COL 1 | COL 3 | COL 5 | MMP 1 | MMP 3 | MMP 13 | IL6   | COX 2 | NFK B | P5 3  | AL P  | FA K  |       |
|-----------------------|------------------------|-------|-------|-------|-------|-------|-------|-------|-------|-------|--------|-------|-------|-------|-------|-------|-------|-------|
| Healthy               | mouse                  | diff  | 2.65  | -0.74 | -1.05 | -3.03 | 2.54  | -2.17 | -9.34 | 9.45  | 8.50   | 4.65  | 9.40  | -0.20 | -0.30 | 3.14  | -0.25 |       |
|                       |                        | adj p | 0.230 | 0.811 | 0.951 | 0.038 | 0.122 | 0.609 | 0.064 | 0.002 | 0.000  | 0.000 | 0.005 | 0.999 | 0.961 | 0.032 | 0.995 |       |
|                       | rat                    | diff  | 5.28  | 2.84  | -1.37 | 3.95  | 3.80  | 4.62  | -2.97 | 10.24 | 5.24   | 0.54  | 11.30 | 3.00  | 4.47  | 1.85  | 4.72  |       |
|                       |                        | adj p | 0.008 | 0.014 | 0.882 | 0.008 | 0.015 | 0.067 | 0.851 | 0.001 | 0.013  | 0.978 | 0.000 | 0.053 | 0.000 | 0.287 | 0.000 |       |
|                       | sheep                  | diff  | 2.39  | 3.79  | -3.52 | -7.91 | -0.50 | 0.41  | -4.71 | 9.12  | 9.47   | -0.16 | 13.61 | -0.72 | -0.36 | -0.14 | 3.95  |       |
|                       |                        | adj p | 0.313 | 0.002 | 0.201 | 0.000 | 0.981 | 0.998 | 0.539 | 0.003 | 0.000  | 1.000 | 0.000 | 0.931 | 0.927 | 1.000 | 0.001 |       |
|                       | horse                  | diff  | 1.49  | -0.24 | -3.11 | -4.72 | 0.41  | 1.71  | -2.93 | 1.94  | 5.37   | -3.67 | 15.65 | 3.79  | 3.52  | -1.11 | 2.11  |       |
|                       |                        | adj p | 0.711 | 0.996 | 0.296 | 0.002 | 0.991 | 0.780 | 0.857 | 0.793 | 0.012  | 0.022 | 0.000 | 0.014 | 0.000 | 0.720 | 0.055 |       |
|                       | Transient inflammation | mouse | diff  | -1.22 | -0.69 | -2.59 | -2.62 | -3.06 | -3.07 | 1.23  | -5.08  | -4.96 | -4.02 | -4.15 | -1.24 | -0.59 | 0.46  | -0.46 |
|                       |                        |       | adj p | 0.515 | 0.870 | 0.048 | 0.177 | 0.017 | 0.010 | 0.984 | 0.011  | 0.001 | 0.001 | 0.000 | 0.180 | 0.803 | 0.990 | 0.963 |
|                       |                        | rat   | diff  | -2.94 | 1.42  | 2.85  | -2.93 | -4.43 | -3.57 | -0.66 | -3.22  | -1.56 | 0.98  | -4.84 | -0.01 | -0.34 | 1.54  | 1.48  |
|                       |                        |       | adj p | 0.019 | 0.342 | 0.029 | 0.114 | 0.001 | 0.004 | 0.999 | 0.124  | 0.412 | 0.537 | 0.000 | 1.000 | 0.967 | 0.563 | 0.299 |
| sheep                 |                        | diff  | -0.59 | -0.20 | 0.59  | -0.12 | -1.84 | -1.49 | 0.39  | -6.54 | -4.19  | -2.83 | -6.20 | -0.52 | 0.16  | 1.38  | 1.31  |       |
|                       |                        | adj p | 0.930 | 0.998 | 0.937 | 1.000 | 0.189 | 0.291 | 1.000 | 0.002 | 0.004  | 0.007 | 0.000 | 0.841 | 0.998 | 0.651 | 0.404 |       |
| horse                 |                        | diff  | -0.77 | 1.44  | -0.34 | 1.40  | -0.36 | -0.95 | 3.97  | -0.32 | 0.15   | 3.25  | -6.63 | -0.16 | 1.38  | 2.22  | 0.98  |       |
|                       |                        | adj p | 0.840 | 0.330 | 0.992 | 0.691 | 0.989 | 0.671 | 0.498 | 0.999 | 1.000  | 0.003 | 0.000 | 0.997 | 0.152 | 0.249 | 0.658 |       |
| Constant inflammation |                        | mouse | diff  | -1.23 | 0.51  | 3.33  | -1.89 | -3.30 | -2.52 | 1.64  | -4.82  | -3.41 | 4.54  | -3.96 | -1.33 | 0.09  | 2.83  | 0.22  |
|                       |                        |       | adj p | 0.911 | 0.949 | 0.166 | 0.361 | 0.003 | 0.501 | 0.977 | 0.014  | 0.209 | 0.021 | 0.094 | 0.586 | 1.000 | 0.093 | 0.998 |
|                       |                        | rat   | diff  | -3.27 | 1.76  | 4.86  | -3.80 | -7.16 | -5.29 | 4.75  | -1.96  | 3.26  | 1.13  | -1.71 | 0.13  | 0.18  | -1.09 | -1.35 |
|                       |                        |       | adj p | 0.238 | 0.177 | 0.028 | 0.020 | 0.000 | 0.039 | 0.509 | 0.490  | 0.241 | 0.866 | 0.727 | 1.000 | 0.999 | 0.797 | 0.412 |
|                       | sheep                  | diff  | -2.01 | 0.63  | 1.41  | 0.56  | -1.81 | -2.94 | 1.51  | -6.73 | -2.93  | 0.42  | -7.68 | -0.18 | 0.19  | 1.24  | 1.48  |       |
|                       |                        | adj p | 0.653 | 0.900 | 0.822 | 0.975 | 0.111 | 0.366 | 0.983 | 0.001 | 0.328  | 0.996 | 0.002 | 1.000 | 0.999 | 0.719 | 0.333 |       |
|                       | horse                  | diff  | -3.10 | 2.28  | 1.74  | 1.37  | -0.39 | -2.04 | 3.59  | -0.24 | 1.49   | 5.53  | -8.36 | -0.63 | 0.95  | 3.18  | 0.58  |       |
|                       |                        | adj p | 0.280 | 0.059 | 0.693 | 0.637 | 0.972 | 0.679 | 0.733 | 1.000 | 0.839  | 0.006 | 0.001 | 0.949 | 0.678 | 0.054 | 0.932 |       |



922 Table 3: Mahalanobis distances of the four model species to humans for all genes combined  
923 under healthy, transiently and constantly inflamed conditions as well as for the different  
924 functional gene groups: tenogenic markers, collagens, MMPS and inflammatory mediators.  
925

|                                                                | <b>Mouse</b> | <b>Rat</b> | <b>Sheep</b> | <b>Horse</b> |
|----------------------------------------------------------------|--------------|------------|--------------|--------------|
| <b>Mahalanobis distances all genes per condition</b>           |              |            |              |              |
| <b>Healthy</b>                                                 | 20.01        | 27.44      | 24.78        | 23.05        |
| <b>Transient Inflammation</b>                                  | 13.49        | 18.66      | 10.62        | 9.59         |
| <b>Constant Inflammation</b>                                   | 10.50        | 17.45      | 8.94         | 12.97        |
| <b>Mahalanobis distances all conditions per group of genes</b> |              |            |              |              |
| <b>SCX, TNC, TNMD</b>                                          | 5.45         | 12.21      | 10.54        | 6.88         |
| <b>COL1, COL3, COL5</b>                                        | 8.28         | 13.73      | 12.88        | 8.45         |
| <b>MMP1, MMP3, MMP13</b>                                       | 8.53         | 11.27      | 8.60         | 4.65         |
| <b>COX2, IL6,</b>                                              | 15.82        | 14.25      | 18.51        | 17.77        |

926  
927  
928

Mouse

Rat

Sheep

Horse

Human

A

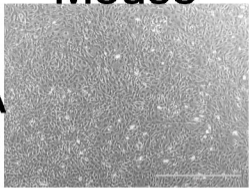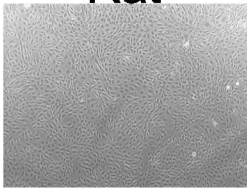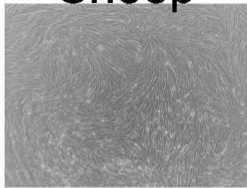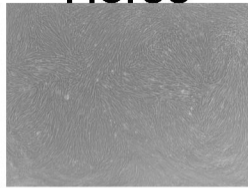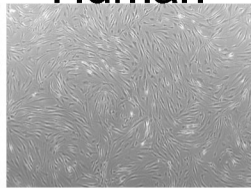

B

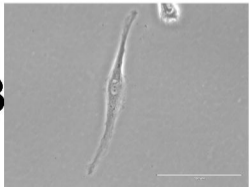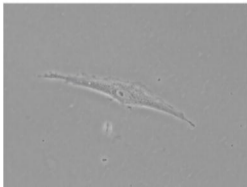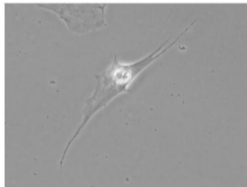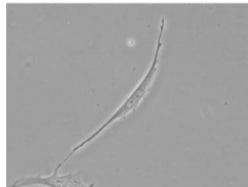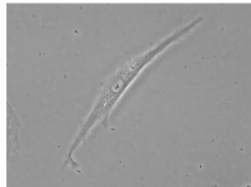

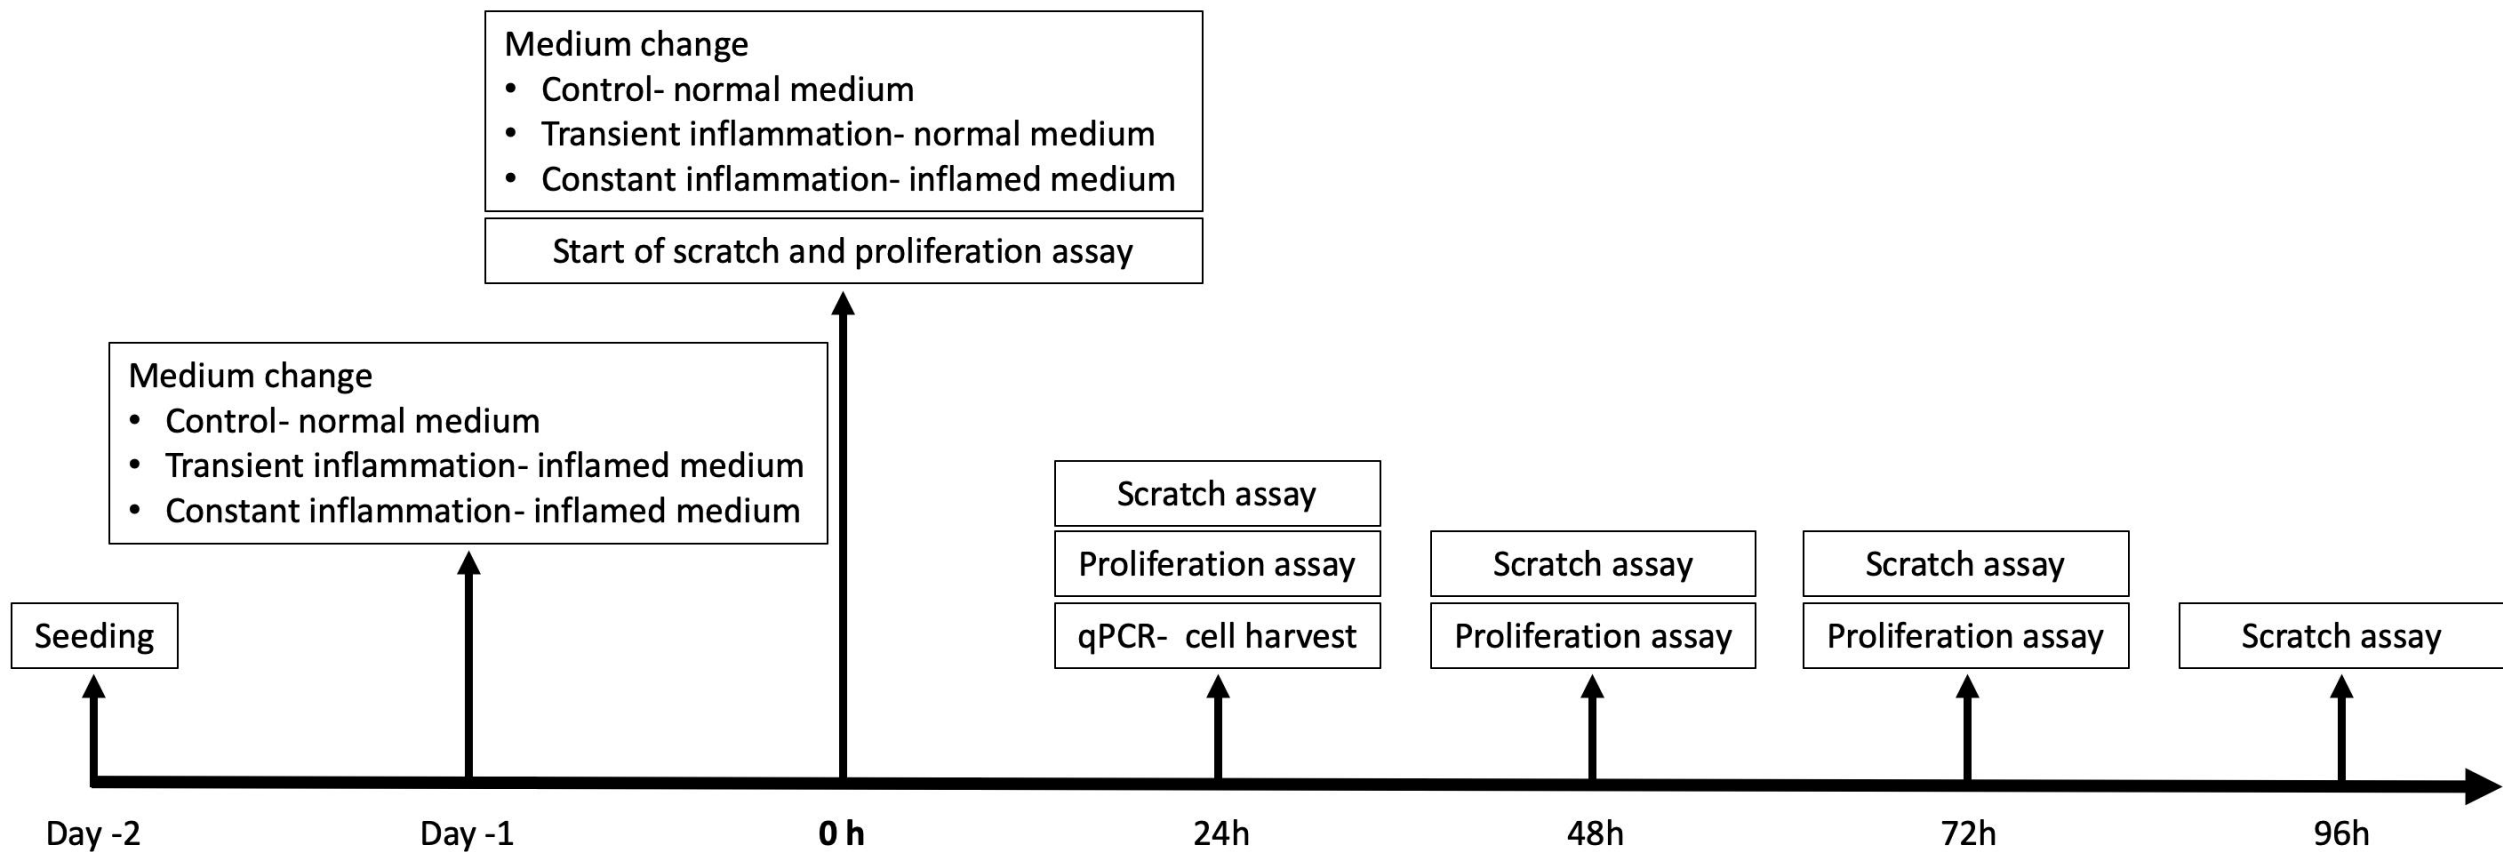

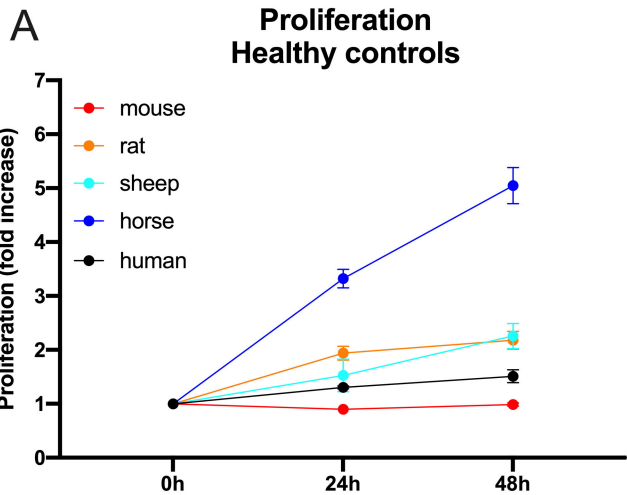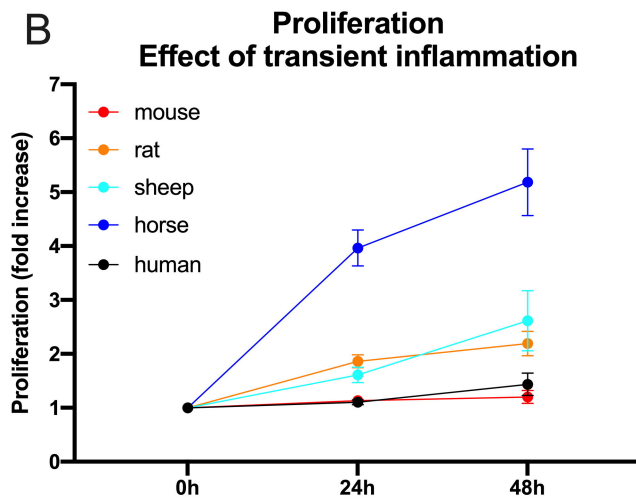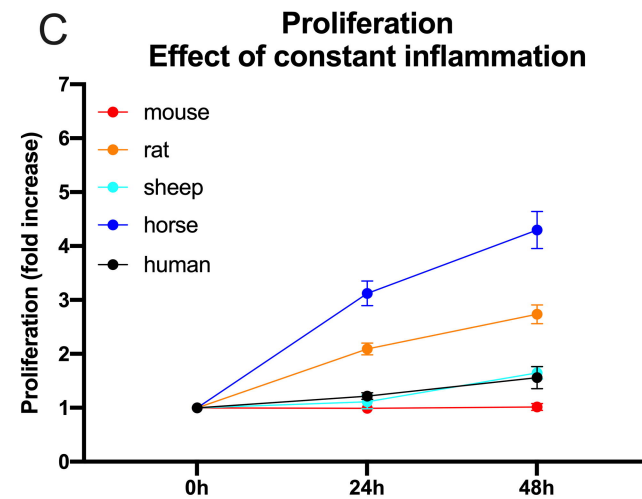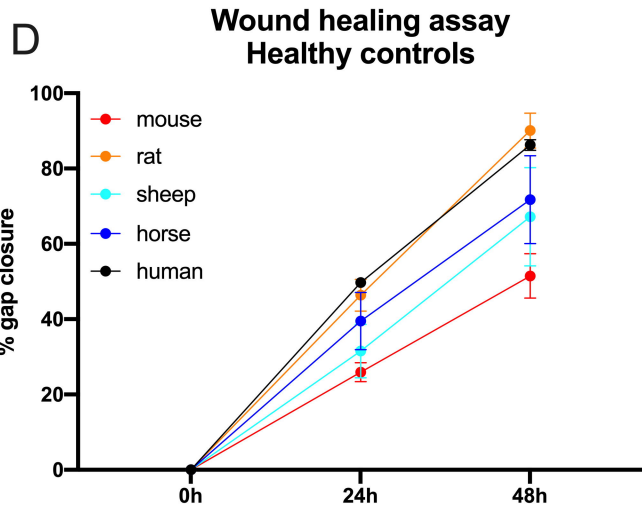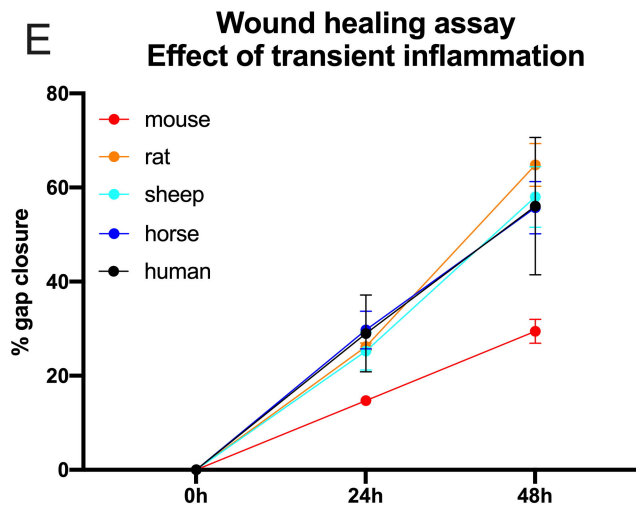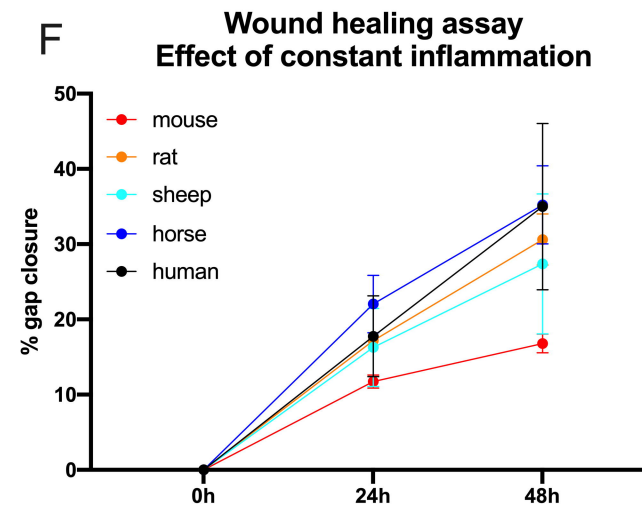

# Healthy

# Transient Inflammation

# Constant Inflammation

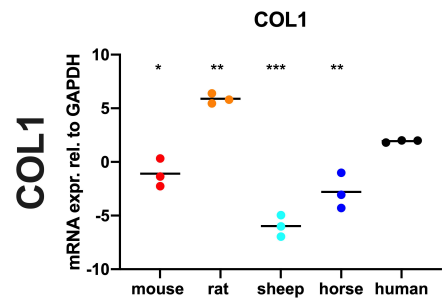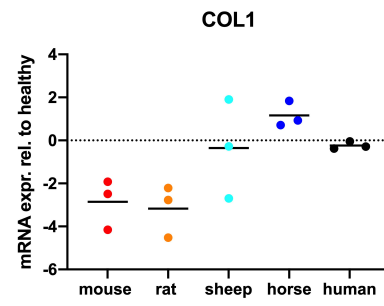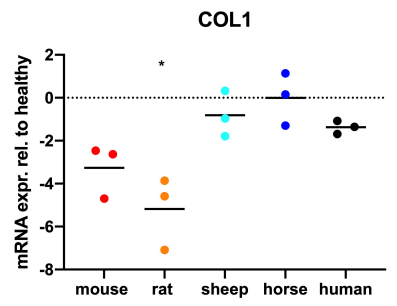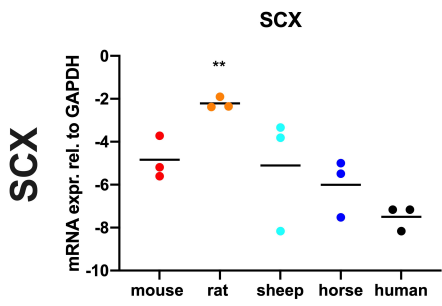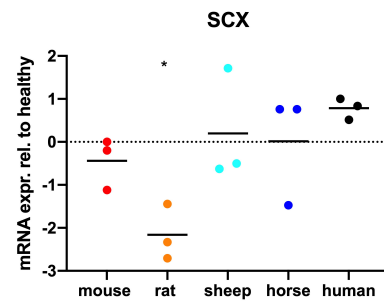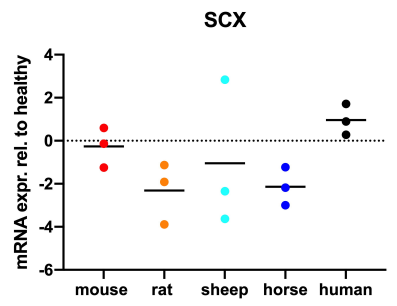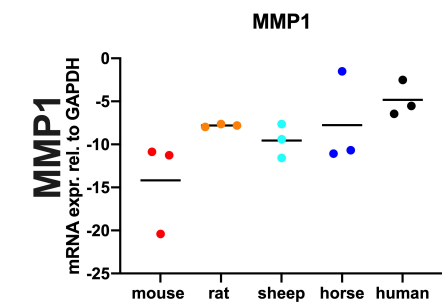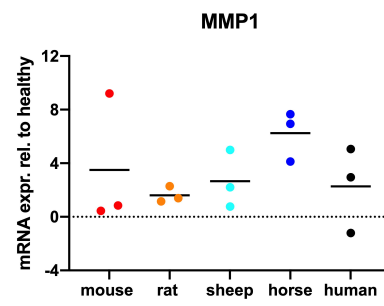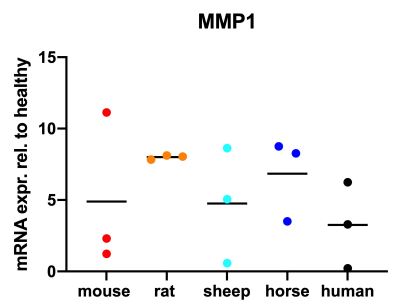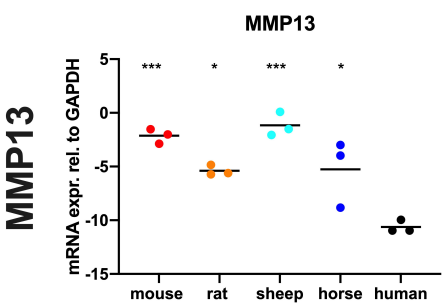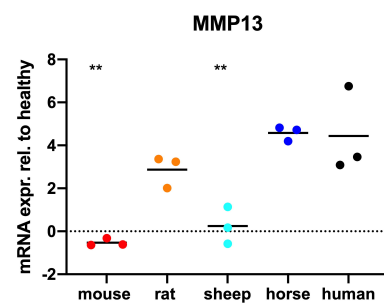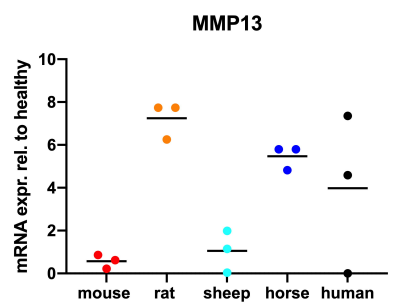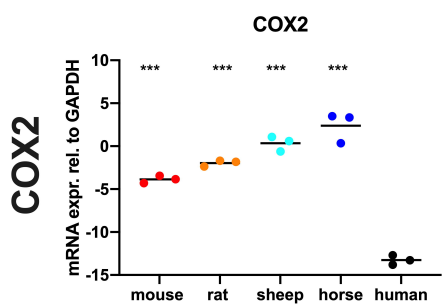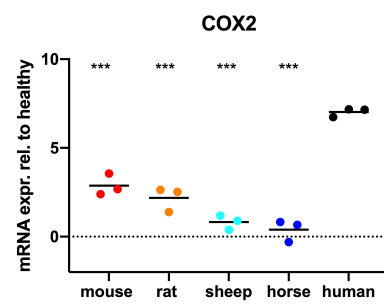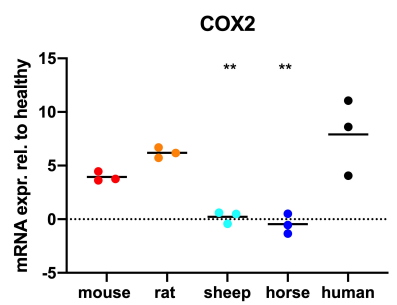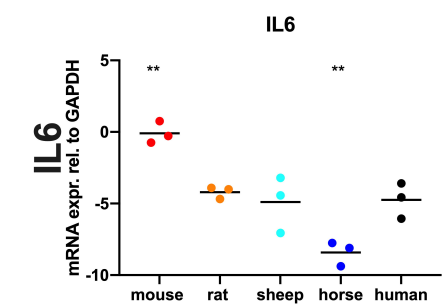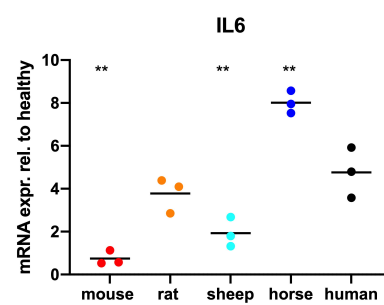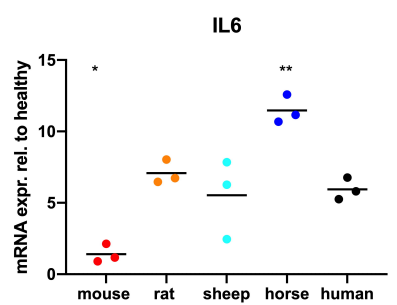

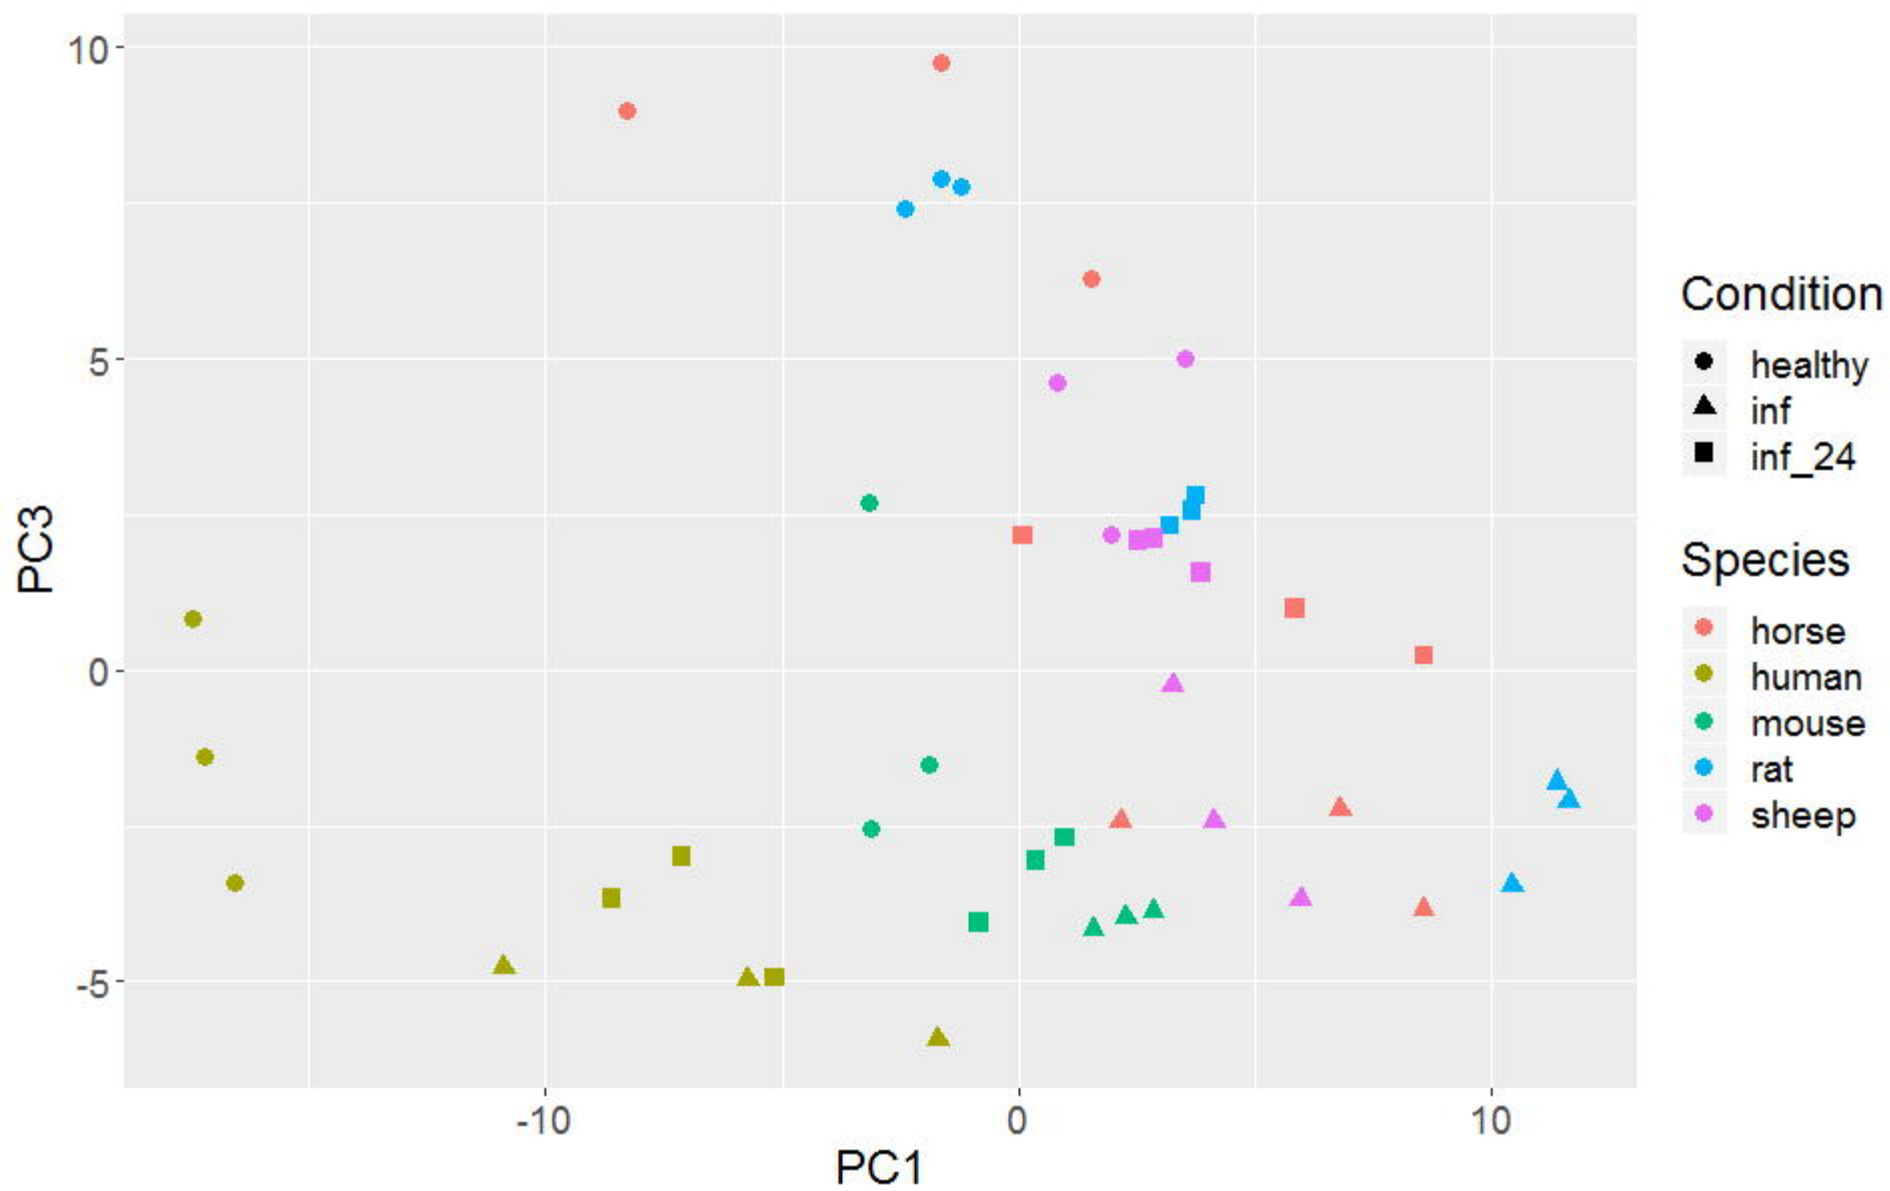

Source: http://biorxiv.org/content/10.1101/2021.05.09.443263v1.full.pdf
